# Supplementary material for: Estimating probabilities of malaria importation in southern Mozambique through P. falciparum genomics and mobility patterns
Source: medRxiv preprint, doi:10.1101/2025.05.01.25326793, version 4 (2026-04-21)
Supplement: Sample list [file 326793_file02.xlsx]

## Sheet: Sheet1
	sample_id	Bioproject	Biosample	Collection_date	Country	Province	Sample_type
0	1.97515e+06	PRJNA1287343	SAMN49839277	Jun-2022	Mozambique	Inhambane	dried blood spot
1	1.97524e+06	PRJNA1287343	SAMN49839285	Jun-2022	Mozambique	Inhambane	dried blood spot
2	1.97525e+06	PRJNA1287343	SAMN49839193	Jun-2022	Mozambique	Inhambane	dried blood spot
3	1.97526e+06	PRJNA1287343	SAMN49839235	Jun-2022	Mozambique	Inhambane	dried blood spot
4	1.97526e+06	PRJNA1287343	SAMN49839296	Jun-2022	Mozambique	Inhambane	dried blood spot
5	1.97524e+06	PRJNA1287343	SAMN49839393	Jun-2022	Mozambique	Inhambane	dried blood spot
6	1.97526e+06	PRJNA1287343	SAMN49839208	Jun-2022	Mozambique	Inhambane	dried blood spot
7	1.97527e+06	PRJNA1287343	SAMN49839313	Jun-2022	Mozambique	Inhambane	dried blood spot
8	1975273	PRJNA1287343	SAMN49839151	Jun-2022	Mozambique	Inhambane	dried blood spot
9	1.97516e+06	PRJNA1287343	SAMN49839198	Jun-2022	Mozambique	Inhambane	dried blood spot
10	1.97527e+06	PRJNA1287343	SAMN49839418	Jun-2022	Mozambique	Inhambane	dried blood spot
11	1.97529e+06	PRJNA1287343	SAMN49839197	Jun-2022	Mozambique	Inhambane	dried blood spot
12	1.97526e+06	PRJNA1287343	SAMN49839163	Jun-2022	Mozambique	Inhambane	dried blood spot
13	1.97531e+06	PRJNA1287343	SAMN49839130	Jun-2022	Mozambique	Inhambane	dried blood spot
14	1.97527e+06	PRJNA1287343	SAMN49839207	Jun-2022	Mozambique	Inhambane	dried blood spot
15	1.97531e+06	PRJNA1287343	SAMN49839319	Jun-2022	Mozambique	Inhambane	dried blood spot
16	1.97525e+06	PRJNA1287343	SAMN49839420	Jun-2022	Mozambique	Inhambane	dried blood spot
17	1.97528e+06	PRJNA1287343	SAMN49839389	Jun-2022	Mozambique	Inhambane	dried blood spot
18	1.97516e+06	PRJNA1287343	SAMN49839132	Jun-2022	Mozambique	Inhambane	dried blood spot
19	1.97527e+06	PRJNA1287343	SAMN49839247	Jun-2022	Mozambique	Inhambane	dried blood spot
20	1.9753e+06	PRJNA1287343	SAMN49839276	Jun-2022	Mozambique	Inhambane	dried blood spot
21	1.9753e+06	PRJNA1287343	SAMN49839220	Jun-2022	Mozambique	Inhambane	dried blood spot
22	1.97527e+06	PRJNA1287343	SAMN49839217	Jun-2022	Mozambique	Inhambane	dried blood spot
23	1975286	PRJNA1287343	SAMN49839287	Jun-2022	Mozambique	Inhambane	dried blood spot
24	1.97529e+06	PRJNA1287343	SAMN49839205	Jun-2022	Mozambique	Inhambane	dried blood spot
25	1.97528e+06	PRJNA1287343	SAMN49839181	Jun-2022	Mozambique	Inhambane	dried blood spot
26	1.97528e+06	PRJNA1287343	SAMN49839273	Jun-2022	Mozambique	Inhambane	dried blood spot
27	1.97528e+06	PRJNA1287343	SAMN49839280	Jun-2022	Mozambique	Inhambane	dried blood spot
28	1.97531e+06	PRJNA1287343	SAMN49839354	Jun-2022	Mozambique	Inhambane	dried blood spot
29	1975327	PRJNA1287343	SAMN49839318	Jun-2022	Mozambique	Inhambane	dried blood spot
30	1.97531e+06	PRJNA1287343	SAMN49839388	Jun-2022	Mozambique	Inhambane	dried blood spot
31	1.97529e+06	PRJNA1287343	SAMN49839342	Jun-2022	Mozambique	Inhambane	dried blood spot
32	1.97529e+06	PRJNA1287343	SAMN49839316	Jun-2022	Mozambique	Inhambane	dried blood spot
33	1.97532e+06	PRJNA1287343	SAMN49839336	Jun-2022	Mozambique	Inhambane	dried blood spot
34	1.97527e+06	PRJNA1287343	SAMN49839268	Jun-2022	Mozambique	Inhambane	dried blood spot
35	1.97531e+06	PRJNA1287343	SAMN49839173	Jun-2022	Mozambique	Inhambane	dried blood spot
36	1.97517e+06	PRJNA1287343	SAMN49839263	Jun-2022	Mozambique	Inhambane	dried blood spot
37	1.97531e+06	PRJNA1287343	SAMN49839190	Jun-2022	Mozambique	Inhambane	dried blood spot
38	1.97532e+06	PRJNA1287343	SAMN49839398	Jun-2022	Mozambique	Inhambane	dried blood spot
39	1.97532e+06	PRJNA1287343	SAMN49839215	Jun-2022	Mozambique	Inhambane	dried blood spot
40	1.97533e+06	PRJNA1287343	SAMN49839403	Jun-2022	Mozambique	Inhambane	dried blood spot
41	1975343	PRJNA1287343	SAMN49839325	Jun-2022	Mozambique	Inhambane	dried blood spot
42	1975314	PRJNA1287343	SAMN49839146	Jun-2022	Mozambique	Inhambane	dried blood spot
43	1.97532e+06	PRJNA1287343	SAMN49839169	Jun-2022	Mozambique	Inhambane	dried blood spot
44	1.97531e+06	PRJNA1287343	SAMN49839368	Jun-2022	Mozambique	Inhambane	dried blood spot
45	1.97534e+06	PRJNA1287343	SAMN49839306	Jun-2022	Mozambique	Inhambane	dried blood spot
46	1.97517e+06	PRJNA1287343	SAMN49839204	Jun-2022	Mozambique	Inhambane	dried blood spot
47	1.97533e+06	PRJNA1287343	SAMN49839133	Jun-2022	Mozambique	Inhambane	dried blood spot
48	1.97533e+06	PRJNA1287343	SAMN49839203	Jun-2022	Mozambique	Inhambane	dried blood spot
49	1975330	PRJNA1287343	SAMN49839131	Jun-2022	Mozambique	Inhambane	dried blood spot
50	1.97532e+06	PRJNA1287343	SAMN49839134	Jun-2022	Mozambique	Inhambane	dried blood spot
51	1.97532e+06	PRJNA1287343	SAMN49839311	Jun-2022	Mozambique	Inhambane	dried blood spot
52	1.97534e+06	PRJNA1287343	SAMN49839288	Jun-2022	Mozambique	Inhambane	dried blood spot
53	1.97532e+06	PRJNA1287343	SAMN49839301	Jun-2022	Mozambique	Inhambane	dried blood spot
54	1.97534e+06	PRJNA1287343	SAMN49839417	Jun-2022	Mozambique	Inhambane	dried blood spot
55	1.97534e+06	PRJNA1287343	SAMN49839189	Jun-2022	Mozambique	Inhambane	dried blood spot
56	1.97532e+06	PRJNA1287343	SAMN49839407	Jun-2022	Mozambique	Inhambane	dried blood spot
57	1975132	PRJNA1287343	SAMN49839156	Jun-2022	Mozambique	Inhambane	dried blood spot
58	1.97538e+06	PRJNA1287343	SAMN49839302	Jun-2022	Mozambique	Inhambane	dried blood spot
59	1.97533e+06	PRJNA1287343	SAMN49839405	Jun-2022	Mozambique	Inhambane	dried blood spot
60	1.97532e+06	PRJNA1287343	SAMN49839377	Jun-2022	Mozambique	Inhambane	dried blood spot
61	1.97534e+06	PRJNA1287343	SAMN49839283	Jun-2022	Mozambique	Inhambane	dried blood spot
62	1.97538e+06	PRJNA1287343	SAMN49839254	Jun-2022	Mozambique	Inhambane	dried blood spot
63	1.97539e+06	PRJNA1287343	SAMN49839373	Jun-2022	Mozambique	Inhambane	dried blood spot
64	1.97542e+06	PRJNA1287343	SAMN49839241	Jun-2022	Mozambique	Inhambane	dried blood spot
65	1.97533e+06	PRJNA1287343	SAMN49839255	Jun-2022	Mozambique	Inhambane	dried blood spot
66	1.97541e+06	PRJNA1287343	SAMN49839257	Jun-2022	Mozambique	Inhambane	dried blood spot
67	1.97541e+06	PRJNA1287343	SAMN49839391	Jun-2022	Mozambique	Inhambane	dried blood spot
68	1.97533e+06	PRJNA1287343	SAMN49839315	Jun-2022	Mozambique	Inhambane	dried blood spot
69	1.97541e+06	PRJNA1287343	SAMN49839412	Jun-2022	Mozambique	Inhambane	dried blood spot
70	1.97541e+06	PRJNA1287343	SAMN49839155	Jun-2022	Mozambique	Inhambane	dried blood spot
71	1.97541e+06	PRJNA1287343	SAMN49839349	Jun-2022	Mozambique	Inhambane	dried blood spot
72	1.97533e+06	PRJNA1287343	SAMN49839333	Jun-2022	Mozambique	Inhambane	dried blood spot
73	1.97539e+06	PRJNA1287343	SAMN49839414	Jun-2022	Mozambique	Inhambane	dried blood spot
74	1975413	PRJNA1287343	SAMN49839186	Jun-2022	Mozambique	Inhambane	dried blood spot
75	1.9754e+06	PRJNA1287343	SAMN49839206	Jun-2022	Mozambique	Inhambane	dried blood spot
76	1.97534e+06	PRJNA1287343	SAMN49839394	Jun-2022	Mozambique	Inhambane	dried blood spot
77	1.97538e+06	PRJNA1287343	SAMN49839381	Jun-2022	Mozambique	Inhambane	dried blood spot
78	1.97513e+06	PRJNA1287343	SAMN49839252	Jun-2022	Mozambique	Inhambane	dried blood spot
79	1.97541e+06	PRJNA1287343	SAMN49839348	Jun-2022	Mozambique	Inhambane	dried blood spot
80	1.97538e+06	PRJNA1287343	SAMN49839282	Jun-2022	Mozambique	Inhambane	dried blood spot
81	1.97543e+06	PRJNA1287343	SAMN49839202	Jun-2022	Mozambique	Inhambane	dried blood spot
82	1.97539e+06	PRJNA1287343	SAMN49839224	Jun-2022	Mozambique	Inhambane	dried blood spot
83	1.97541e+06	PRJNA1287343	SAMN49839237	Jun-2022	Mozambique	Inhambane	dried blood spot
84	1.97546e+06	PRJNA1287343	SAMN49839357	Jun-2022	Mozambique	Inhambane	dried blood spot
85	1.97543e+06	PRJNA1287343	SAMN49839401	Jun-2022	Mozambique	Inhambane	dried blood spot
86	1.97539e+06	PRJNA1287343	SAMN49839199	Jun-2022	Mozambique	Inhambane	dried blood spot
87	1.97545e+06	PRJNA1287343	SAMN49839219	Jun-2022	Mozambique	Inhambane	dried blood spot
88	1.97517e+06	PRJNA1287343	SAMN49839382	Jun-2022	Mozambique	Inhambane	dried blood spot
89	1.97538e+06	PRJNA1287343	SAMN49839246	Jun-2022	Mozambique	Inhambane	dried blood spot
90	1.97547e+06	PRJNA1287343	SAMN49839135	Jun-2022	Mozambique	Inhambane	dried blood spot
91	1.97545e+06	PRJNA1287343	SAMN49839356	Jun-2022	Mozambique	Inhambane	dried blood spot
92	1.97547e+06	PRJNA1287343	SAMN49839293	Jun-2022	Mozambique	Inhambane	dried blood spot
93	1.97545e+06	PRJNA1287343	SAMN49839416	Jun-2022	Mozambique	Inhambane	dried blood spot
94	1975426	PRJNA1287343	SAMN49839201	Jun-2022	Mozambique	Inhambane	dried blood spot
95	1.97545e+06	PRJNA1287343	SAMN49839372	Jun-2022	Mozambique	Inhambane	dried blood spot
96	1.97546e+06	PRJNA1287343	SAMN49839371	Jun-2022	Mozambique	Inhambane	dried blood spot
97	1.97534e+06	PRJNA1287343	SAMN49839404	Jun-2022	Mozambique	Inhambane	dried blood spot
98	1.97514e+06	PRJNA1287343	SAMN49839413	Jun-2022	Mozambique	Inhambane	dried blood spot
99	1.97513e+06	PRJNA1287343	SAMN49839159	Jun-2022	Mozambique	Inhambane	dried blood spot
100	1.97545e+06	PRJNA1287343	SAMN49839248	Jun-2022	Mozambique	Inhambane	dried blood spot
101	1.97546e+06	PRJNA1287343	SAMN49839310	Jun-2022	Mozambique	Inhambane	dried blood spot
102	1.97547e+06	PRJNA1287343	SAMN49839386	Jun-2022	Mozambique	Inhambane	dried blood spot
103	1.97549e+06	PRJNA1287343	SAMN49839264	Jun-2022	Mozambique	Inhambane	dried blood spot
104	1.97546e+06	PRJNA1287343	SAMN49839176	Jun-2022	Mozambique	Inhambane	dried blood spot
105	1.97548e+06	PRJNA1287343	SAMN49839261	Jun-2022	Mozambique	Inhambane	dried blood spot
106	1.97548e+06	PRJNA1287343	SAMN49839136	Jun-2022	Mozambique	Inhambane	dried blood spot
107	1.97545e+06	PRJNA1287343	SAMN49839180	Jun-2022	Mozambique	Inhambane	dried blood spot
108	1.97547e+06	PRJNA1287343	SAMN49839165	Jun-2022	Mozambique	Inhambane	dried blood spot
109	1.97517e+06	PRJNA1287343	SAMN49839309	Jun-2022	Mozambique	Inhambane	dried blood spot
110	1.9755e+06	PRJNA1287343	SAMN49839322	Jun-2022	Mozambique	Inhambane	dried blood spot
111	1.97548e+06	PRJNA1287343	SAMN49839338	Jun-2022	Mozambique	Inhambane	dried blood spot
112	1.97545e+06	PRJNA1287343	SAMN49839242	Jun-2022	Mozambique	Inhambane	dried blood spot
113	1.97548e+06	PRJNA1287343	SAMN49839341	Jun-2022	Mozambique	Inhambane	dried blood spot
114	1.97547e+06	PRJNA1287343	SAMN49839270	Jun-2022	Mozambique	Inhambane	dried blood spot
115	1.97547e+06	PRJNA1287343	SAMN49839335	Jun-2022	Mozambique	Inhambane	dried blood spot
116	1.97548e+06	PRJNA1287343	SAMN49839158	Jun-2022	Mozambique	Inhambane	dried blood spot
117	1975484	PRJNA1287343	SAMN49839232	Jun-2022	Mozambique	Inhambane	dried blood spot
118	1975174	PRJNA1287343	SAMN49839239	Jun-2022	Mozambique	Inhambane	dried blood spot
119	1975468	PRJNA1287343	SAMN49839328	Jun-2022	Mozambique	Inhambane	dried blood spot
120	1.97546e+06	PRJNA1287343	SAMN49839300	Jun-2022	Mozambique	Inhambane	dried blood spot
121	1.97549e+06	PRJNA1287343	SAMN49839267	Jun-2022	Mozambique	Inhambane	dried blood spot
122	1975497	PRJNA1287343	SAMN49839274	Jun-2022	Mozambique	Inhambane	dried blood spot
123	1975471	PRJNA1287343	SAMN49839178	Jun-2022	Mozambique	Inhambane	dried blood spot
124	1.97549e+06	PRJNA1287343	SAMN49839200	Jun-2022	Mozambique	Inhambane	dried blood spot
125	1.97551e+06	PRJNA1287343	SAMN49839297	Jun-2022	Mozambique	Inhambane	dried blood spot
126	1.9755e+06	PRJNA1287343	SAMN49839411	Jun-2022	Mozambique	Inhambane	dried blood spot
127	1.97549e+06	PRJNA1287343	SAMN49839361	Jun-2022	Mozambique	Inhambane	dried blood spot
128	1.9755e+06	PRJNA1287343	SAMN49839147	Jun-2022	Mozambique	Inhambane	dried blood spot
129	1975509	PRJNA1287343	SAMN49839210	Jun-2022	Mozambique	Inhambane	dried blood spot
130	1.9755e+06	PRJNA1287343	SAMN49839320	Jun-2022	Mozambique	Inhambane	dried blood spot
131	1.97549e+06	PRJNA1287343	SAMN49839229	Jun-2022	Mozambique	Inhambane	dried blood spot
132	1.9755e+06	PRJNA1287343	SAMN49839350	Jun-2022	Mozambique	Inhambane	dried blood spot
133	1.97551e+06	PRJNA1287343	SAMN49839164	Jun-2022	Mozambique	Inhambane	dried blood spot
134	1.97549e+06	PRJNA1287343	SAMN49839397	Jun-2022	Mozambique	Inhambane	dried blood spot
135	1975161	PRJNA1287343	SAMN49839390	Jun-2022	Mozambique	Inhambane	dried blood spot
136	1.97551e+06	PRJNA1287343	SAMN49839196	Jun-2022	Mozambique	Inhambane	dried blood spot
137	1.9755e+06	PRJNA1287343	SAMN49839304	Jun-2022	Mozambique	Inhambane	dried blood spot
138	1.97551e+06	PRJNA1287343	SAMN49839419	Jun-2022	Mozambique	Inhambane	dried blood spot
139	1.97552e+06	PRJNA1287343	SAMN49839272	Jun-2022	Mozambique	Inhambane	dried blood spot
140	1.97556e+06	PRJNA1287343	SAMN49839383	Jun-2022	Mozambique	Inhambane	dried blood spot
141	1.97551e+06	PRJNA1287343	SAMN49839331	Jun-2022	Mozambique	Inhambane	dried blood spot
142	1.97555e+06	PRJNA1287343	SAMN49839233	Jun-2022	Mozambique	Inhambane	dried blood spot
143	1.97552e+06	PRJNA1287343	SAMN49839345	Jun-2022	Mozambique	Inhambane	dried blood spot
144	1.97552e+06	PRJNA1287343	SAMN49839330	Jun-2022	Mozambique	Inhambane	dried blood spot
145	1.97553e+06	PRJNA1287343	SAMN49839367	Jun-2022	Mozambique	Inhambane	dried blood spot
146	1.97552e+06	PRJNA1287343	SAMN49839143	Jun-2022	Mozambique	Inhambane	dried blood spot
147	1.97552e+06	PRJNA1287343	SAMN49839142	Jun-2022	Mozambique	Inhambane	dried blood spot
148	1.97552e+06	PRJNA1287343	SAMN49839351	Jun-2022	Mozambique	Inhambane	dried blood spot
149	1975512	PRJNA1287343	SAMN49839344	Jun-2022	Mozambique	Inhambane	dried blood spot
150	1.97555e+06	PRJNA1287343	SAMN49839303	Jun-2022	Mozambique	Inhambane	dried blood spot
151	1.97556e+06	PRJNA1287343	SAMN49839279	Jun-2022	Mozambique	Inhambane	dried blood spot
152	1.97555e+06	PRJNA1287343	SAMN49839160	Jun-2022	Mozambique	Inhambane	dried blood spot
153	1.97558e+06	PRJNA1287343	SAMN49839281	Jun-2022	Mozambique	Inhambane	dried blood spot
154	1975583	PRJNA1287343	SAMN49839161	Jun-2022	Mozambique	Inhambane	dried blood spot
155	1.97558e+06	PRJNA1287343	SAMN49839145	Jun-2022	Mozambique	Inhambane	dried blood spot
156	1.97558e+06	PRJNA1287343	SAMN49839194	Jun-2022	Mozambique	Inhambane	dried blood spot
157	1.97559e+06	PRJNA1287343	SAMN49839352	Jun-2022	Mozambique	Inhambane	dried blood spot
158	1.97553e+06	PRJNA1287343	SAMN49839244	Jun-2022	Mozambique	Inhambane	dried blood spot
159	1.97553e+06	PRJNA1287343	SAMN49839209	Jun-2022	Mozambique	Inhambane	dried blood spot
160	1.97516e+06	PRJNA1287343	SAMN49839240	Jun-2022	Mozambique	Inhambane	dried blood spot
161	1.97555e+06	PRJNA1287343	SAMN49839213	Jun-2022	Mozambique	Inhambane	dried blood spot
162	1.97559e+06	PRJNA1287343	SAMN49839339	Jun-2022	Mozambique	Inhambane	dried blood spot
163	1.97559e+06	PRJNA1287343	SAMN49839166	Jun-2022	Mozambique	Inhambane	dried blood spot
164	1.97552e+06	PRJNA1287343	SAMN49839170	Jun-2022	Mozambique	Inhambane	dried blood spot
165	1.97553e+06	PRJNA1287343	SAMN49839223	Jun-2022	Mozambique	Inhambane	dried blood spot
166	1.97558e+06	PRJNA1287343	SAMN49839408	Jun-2022	Mozambique	Inhambane	dried blood spot
167	1.97565e+06	PRJNA1287343	SAMN49839228	Jun-2022	Mozambique	Inhambane	dried blood spot
168	1975596	PRJNA1287343	SAMN49839183	Jun-2022	Mozambique	Inhambane	dried blood spot
169	1975129	PRJNA1287343	SAMN49839174	Jun-2022	Mozambique	Inhambane	dried blood spot
170	1.9756e+06	PRJNA1287343	SAMN49839359	Jun-2022	Mozambique	Inhambane	dried blood spot
171	1.97559e+06	PRJNA1287343	SAMN49839362	Jun-2022	Mozambique	Inhambane	dried blood spot
172	1.97553e+06	PRJNA1287343	SAMN49839234	Jun-2022	Mozambique	Inhambane	dried blood spot
173	1.97559e+06	PRJNA1287343	SAMN49839260	Jun-2022	Mozambique	Inhambane	dried blood spot
174	1975611	PRJNA1287343	SAMN49839332	Jun-2022	Mozambique	Inhambane	dried blood spot
175	1975608	PRJNA1287343	SAMN49839172	Jun-2022	Mozambique	Inhambane	dried blood spot
176	1.9756e+06	PRJNA1287343	SAMN49839192	Jun-2022	Mozambique	Inhambane	dried blood spot
177	1.97561e+06	PRJNA1287343	SAMN49839266	Jun-2022	Mozambique	Inhambane	dried blood spot
178	1.97515e+06	PRJNA1287343	SAMN49839392	Jun-2022	Mozambique	Inhambane	dried blood spot
179	1.97564e+06	PRJNA1287343	SAMN49839363	Jun-2022	Mozambique	Inhambane	dried blood spot
180	1.9756e+06	PRJNA1287343	SAMN49839137	Jun-2022	Mozambique	Inhambane	dried blood spot
181	1.97558e+06	PRJNA1287343	SAMN49839291	Jun-2022	Mozambique	Inhambane	dried blood spot
182	1.97561e+06	PRJNA1287343	SAMN49839157	Jun-2022	Mozambique	Inhambane	dried blood spot
183	1.97571e+06	PRJNA1287343	SAMN49839370	Jun-2022	Mozambique	Inhambane	dried blood spot
184	1.97559e+06	PRJNA1287343	SAMN49839295	Jun-2022	Mozambique	Inhambane	dried blood spot
185	1.97514e+06	PRJNA1287343	SAMN49839292	Jun-2022	Mozambique	Inhambane	dried blood spot
186	1.97572e+06	PRJNA1287343	SAMN49839152	Jun-2022	Mozambique	Inhambane	dried blood spot
187	1.97571e+06	PRJNA1287343	SAMN49839250	Jun-2022	Mozambique	Inhambane	dried blood spot
188	1.97561e+06	PRJNA1287343	SAMN49839307	Jun-2022	Mozambique	Inhambane	dried blood spot
189	1.97518e+06	PRJNA1287343	SAMN49839214	Jun-2022	Mozambique	Inhambane	dried blood spot
190	1.97572e+06	PRJNA1287343	SAMN49839298	Jun-2022	Mozambique	Inhambane	dried blood spot
191	1.97513e+06	PRJNA1287343	SAMN49839346	Jun-2022	Mozambique	Inhambane	dried blood spot
192	1.97518e+06	PRJNA1287343	SAMN49839175	Jun-2022	Mozambique	Inhambane	dried blood spot
193	1975187	PRJNA1287343	SAMN49839187	Jun-2022	Mozambique	Inhambane	dried blood spot
194	1.97518e+06	PRJNA1287343	SAMN49839294	Jun-2022	Mozambique	Inhambane	dried blood spot
195	1.97518e+06	PRJNA1287343	SAMN49839238	Jun-2022	Mozambique	Inhambane	dried blood spot
196	1.9752e+06	PRJNA1287343	SAMN49839245	Jun-2022	Mozambique	Inhambane	dried blood spot
197	1.97514e+06	PRJNA1287343	SAMN49839376	Jun-2022	Mozambique	Inhambane	dried blood spot
198	1.97513e+06	PRJNA1287343	SAMN49839308	Jun-2022	Mozambique	Inhambane	dried blood spot
199	1.97518e+06	PRJNA1287343	SAMN49839139	Jun-2022	Mozambique	Inhambane	dried blood spot
200	1.9752e+06	PRJNA1287343	SAMN49839284	Jun-2022	Mozambique	Inhambane	dried blood spot
201	1.97521e+06	PRJNA1287343	SAMN49839366	Jun-2022	Mozambique	Inhambane	dried blood spot
202	1.97519e+06	PRJNA1287343	SAMN49839177	Jun-2022	Mozambique	Inhambane	dried blood spot
203	1.97519e+06	PRJNA1287343	SAMN49839154	Jun-2022	Mozambique	Inhambane	dried blood spot
204	1.97519e+06	PRJNA1287343	SAMN49839378	Jun-2022	Mozambique	Inhambane	dried blood spot
205	1.97521e+06	PRJNA1287343	SAMN49839265	Jun-2022	Mozambique	Inhambane	dried blood spot
206	1.9752e+06	PRJNA1287343	SAMN49839329	Jun-2022	Mozambique	Inhambane	dried blood spot
207	1.97519e+06	PRJNA1287343	SAMN49839222	Jun-2022	Mozambique	Inhambane	dried blood spot
208	1975190	PRJNA1287343	SAMN49839364	Jun-2022	Mozambique	Inhambane	dried blood spot
209	1.97518e+06	PRJNA1287343	SAMN49839289	Jun-2022	Mozambique	Inhambane	dried blood spot
210	1.97518e+06	PRJNA1287343	SAMN49839218	Jun-2022	Mozambique	Inhambane	dried blood spot
211	1.97518e+06	PRJNA1287343	SAMN49839324	Jun-2022	Mozambique	Inhambane	dried blood spot
212	1.9752e+06	PRJNA1287343	SAMN49839327	Jun-2022	Mozambique	Inhambane	dried blood spot
213	1.97518e+06	PRJNA1287343	SAMN49839211	Jun-2022	Mozambique	Inhambane	dried blood spot
214	1.97521e+06	PRJNA1287343	SAMN49839184	Jun-2022	Mozambique	Inhambane	dried blood spot
215	1.97519e+06	PRJNA1287343	SAMN49839358	Jun-2022	Mozambique	Inhambane	dried blood spot
216	1.9752e+06	PRJNA1287343	SAMN49839256	Jun-2022	Mozambique	Inhambane	dried blood spot
217	1.97521e+06	PRJNA1287343	SAMN49839299	Jun-2022	Mozambique	Inhambane	dried blood spot
218	1.9752e+06	PRJNA1287343	SAMN49839221	Jun-2022	Mozambique	Inhambane	dried blood spot
219	1.97515e+06	PRJNA1287343	SAMN49839182	Jun-2022	Mozambique	Inhambane	dried blood spot
220	1.97521e+06	PRJNA1287343	SAMN49839323	Jun-2022	Mozambique	Inhambane	dried blood spot
221	1.9752e+06	PRJNA1287343	SAMN49839168	Jun-2022	Mozambique	Inhambane	dried blood spot
222	1975202	PRJNA1287343	SAMN49839343	Jun-2022	Mozambique	Inhambane	dried blood spot
223	1.97521e+06	PRJNA1287343	SAMN49839253	Jun-2022	Mozambique	Inhambane	dried blood spot
224	1.97519e+06	PRJNA1287343	SAMN49839269	Jun-2022	Mozambique	Inhambane	dried blood spot
225	1.97521e+06	PRJNA1287343	SAMN49839410	Jun-2022	Mozambique	Inhambane	dried blood spot
226	1.9752e+06	PRJNA1287343	SAMN49839212	Jun-2022	Mozambique	Inhambane	dried blood spot
227	1.97522e+06	PRJNA1287343	SAMN49839216	Jun-2022	Mozambique	Inhambane	dried blood spot
228	1.97522e+06	PRJNA1287343	SAMN49839171	Jun-2022	Mozambique	Inhambane	dried blood spot
229	1.97521e+06	PRJNA1287343	SAMN49839402	Jun-2022	Mozambique	Inhambane	dried blood spot
230	1.97513e+06	PRJNA1287343	SAMN49839275	Jun-2022	Mozambique	Inhambane	dried blood spot
231	1.97523e+06	PRJNA1287343	SAMN49839314	Jun-2022	Mozambique	Inhambane	dried blood spot
232	1.97522e+06	PRJNA1287343	SAMN49839236	Jun-2022	Mozambique	Inhambane	dried blood spot
233	1975244	PRJNA1287343	SAMN49839379	Jun-2022	Mozambique	Inhambane	dried blood spot
234	1.97521e+06	PRJNA1287343	SAMN49839400	Jun-2022	Mozambique	Inhambane	dried blood spot
235	1.97523e+06	PRJNA1287343	SAMN49839321	Jun-2022	Mozambique	Inhambane	dried blood spot
236	1975215	PRJNA1287343	SAMN49839340	Jun-2022	Mozambique	Inhambane	dried blood spot
237	1.97523e+06	PRJNA1287343	SAMN49839374	Jun-2022	Mozambique	Inhambane	dried blood spot
238	1.97523e+06	PRJNA1287343	SAMN49839188	Jun-2022	Mozambique	Inhambane	dried blood spot
239	1.97522e+06	PRJNA1287343	SAMN49839243	Jun-2022	Mozambique	Inhambane	dried blood spot
240	1.97517e+06	PRJNA1287343	SAMN49839226	Jun-2022	Mozambique	Inhambane	dried blood spot
241	1.97525e+06	PRJNA1287343	SAMN49839353	Jun-2022	Mozambique	Inhambane	dried blood spot
242	1.97522e+06	PRJNA1287343	SAMN49839369	Jun-2022	Mozambique	Inhambane	dried blood spot
243	1.97524e+06	PRJNA1287343	SAMN49839409	Jun-2022	Mozambique	Inhambane	dried blood spot
244	1975231	PRJNA1287343	SAMN49839150	Jun-2022	Mozambique	Inhambane	dried blood spot
245	1.97522e+06	PRJNA1287343	SAMN49839355	Jun-2022	Mozambique	Inhambane	dried blood spot
246	1.97522e+06	PRJNA1287343	SAMN49839195	Jun-2022	Mozambique	Inhambane	dried blood spot
247	1975228	PRJNA1287343	SAMN49839360	Jun-2022	Mozambique	Inhambane	dried blood spot
248	1.97523e+06	PRJNA1287343	SAMN49839230	Jun-2022	Mozambique	Inhambane	dried blood spot
249	1.97525e+06	PRJNA1287343	SAMN49839347	Jun-2022	Mozambique	Inhambane	dried blood spot
250	1.97524e+06	PRJNA1287343	SAMN49839162	Jun-2022	Mozambique	Inhambane	dried blood spot
251	1975158	PRJNA1287343	SAMN49839385	Jun-2022	Mozambique	Inhambane	dried blood spot
252	1.97523e+06	PRJNA1287343	SAMN49839384	Jun-2022	Mozambique	Inhambane	dried blood spot
253	1.97525e+06	PRJNA1287343	SAMN49839262	Jun-2022	Mozambique	Inhambane	dried blood spot
254	1.97522e+06	PRJNA1287343	SAMN49839365	Jun-2022	Mozambique	Inhambane	dried blood spot
255	1.97524e+06	PRJNA1287343	SAMN49839337	Jun-2022	Mozambique	Inhambane	dried blood spot
256	1.97524e+06	PRJNA1287343	SAMN49839317	Jun-2022	Mozambique	Inhambane	dried blood spot
257	1.97525e+06	PRJNA1287343	SAMN49839191	Jun-2022	Mozambique	Inhambane	dried blood spot
258	1.97525e+06	PRJNA1287343	SAMN49839179	Jun-2022	Mozambique	Inhambane	dried blood spot
259	1.92241e+06	PRJNA1107381	SAMN45635392	2022-04-05	Mozambique	Maputo	Rapid diagnostic test (RDT)
260	1.92247e+06	PRJNA1107381	SAMN45635393	2022-05-02	Mozambique	Maputo	Rapid diagnostic test (RDT)
261	1.94142e+06	PRJNA1107381	SAMN45635394	2022	Mozambique	Maputo	Rapid diagnostic test (RDT)
262	1.94135e+06	PRJNA1107381	SAMN45635395	2022-02-10	Mozambique	Maputo	Rapid diagnostic test (RDT)
263	1.94135e+06	PRJNA1107381	SAMN45635396	2022	Mozambique	Maputo	Rapid diagnostic test (RDT)
264	1.94151e+06	PRJNA1107381	SAMN45635397	2022-03-18	Mozambique	Maputo	Rapid diagnostic test (RDT)
265	1.94132e+06	PRJNA1107381	SAMN45635398	2022-03-28	Mozambique	Maputo	Rapid diagnostic test (RDT)
266	1.94142e+06	PRJNA1107381	SAMN45635399	2022-05-10	Mozambique	Maputo	Rapid diagnostic test (RDT)
267	1.94132e+06	PRJNA1107381	SAMN45635400	2022-03-22	Mozambique	Maputo	Rapid diagnostic test (RDT)
268	1941414	PRJNA1107381	SAMN45635401	2022	Mozambique	Maputo	Rapid diagnostic test (RDT)
269	1.94132e+06	PRJNA1107381	SAMN45635402	2022-04-06	Mozambique	Maputo	Rapid diagnostic test (RDT)
270	1.9226e+06	PRJNA1107381	SAMN45635403	2022-02-08	Mozambique	Maputo	Rapid diagnostic test (RDT)
271	1.94143e+06	PRJNA1107381	SAMN45635404	2022	Mozambique	Maputo	Rapid diagnostic test (RDT)
272	1.94143e+06	PRJNA1107381	SAMN45635405	2022	Mozambique	Maputo	Rapid diagnostic test (RDT)
273	1.94154e+06	PRJNA1107381	SAMN45635406	2022-03-16	Mozambique	Maputo	Rapid diagnostic test (RDT)
274	1941430	PRJNA1107381	SAMN45635407	2022-02-23	Mozambique	Maputo	Rapid diagnostic test (RDT)
275	1.94145e+06	PRJNA1107381	SAMN45635408	2022-03-14	Mozambique	Maputo	Rapid diagnostic test (RDT)
276	1.94145e+06	PRJNA1107381	SAMN45635409	2022-02-09	Mozambique	Maputo	Rapid diagnostic test (RDT)
277	1.94146e+06	PRJNA1107381	SAMN45635410	2022-02-12	Mozambique	Maputo	Rapid diagnostic test (RDT)
278	1.94146e+06	PRJNA1107381	SAMN45635411	2022-03-02	Mozambique	Maputo	Rapid diagnostic test (RDT)
279	1.94145e+06	PRJNA1107381	SAMN45635412	2022	Mozambique	Maputo	Rapid diagnostic test (RDT)
280	1.92251e+06	PRJNA1107381	SAMN45635413	2022-01-25	Mozambique	Maputo	Rapid diagnostic test (RDT)
281	1.94146e+06	PRJNA1107381	SAMN45635414	2022	Mozambique	Maputo	Rapid diagnostic test (RDT)
282	1.94145e+06	PRJNA1107381	SAMN45635415	2022-03-28	Mozambique	Maputo	Rapid diagnostic test (RDT)
283	1.94145e+06	PRJNA1107381	SAMN45635416	2022	Mozambique	Maputo	Rapid diagnostic test (RDT)
284	1.94155e+06	PRJNA1107381	SAMN45635417	2022-07-04	Mozambique	Maputo	Rapid diagnostic test (RDT)
285	1.94158e+06	PRJNA1107381	SAMN45635418	2022-02-28	Mozambique	Maputo	Rapid diagnostic test (RDT)
286	1941456	PRJNA1107381	SAMN45635419	2022	Mozambique	Maputo	Rapid diagnostic test (RDT)
287	1.94147e+06	PRJNA1107381	SAMN45635420	2022-09-08	Mozambique	Maputo	Rapid diagnostic test (RDT)
288	1.94147e+06	PRJNA1107381	SAMN45635421	2022	Mozambique	Maputo	Rapid diagnostic test (RDT)
289	1.94146e+06	PRJNA1107381	SAMN45635422	2022-02-28	Mozambique	Maputo	Rapid diagnostic test (RDT)
290	1.94148e+06	PRJNA1107381	SAMN45635423	2022	Mozambique	Maputo	Rapid diagnostic test (RDT)
291	1.9225e+06	PRJNA1107381	SAMN45635424	2022	Mozambique	Maputo	Rapid diagnostic test (RDT)
292	1.94159e+06	PRJNA1107381	SAMN45635425	2022-01-28	Mozambique	Maputo	Rapid diagnostic test (RDT)
293	1941472	PRJNA1107381	SAMN45635426	2022	Mozambique	Maputo	Rapid diagnostic test (RDT)
294	1.94151e+06	PRJNA1107381	SAMN45635427	2022	Mozambique	Maputo	Rapid diagnostic test (RDT)
295	1.94171e+06	PRJNA1107381	SAMN45635428	2022-04-22	Mozambique	Maputo	Rapid diagnostic test (RDT)
296	1941513	PRJNA1107381	SAMN45635429	2022	Mozambique	Maputo	Rapid diagnostic test (RDT)
297	1.94147e+06	PRJNA1107381	SAMN45635430	2022	Mozambique	Maputo	Rapid diagnostic test (RDT)
298	1.9415e+06	PRJNA1107381	SAMN45635431	2022-03-04	Mozambique	Maputo	Rapid diagnostic test (RDT)
299	1.94148e+06	PRJNA1107381	SAMN45635432	2022-02-08	Mozambique	Maputo	Rapid diagnostic test (RDT)
300	1.94152e+06	PRJNA1107381	SAMN45635433	2022-02-28	Mozambique	Maputo	Rapid diagnostic test (RDT)
301	1.92258e+06	PRJNA1107381	SAMN45635434	2022-01-14	Mozambique	Maputo	Rapid diagnostic test (RDT)
302	1.9416e+06	PRJNA1107381	SAMN45635435	2022-03-14	Mozambique	Maputo	Rapid diagnostic test (RDT)
303	1.94151e+06	PRJNA1107381	SAMN45635436	2022	Mozambique	Maputo	Rapid diagnostic test (RDT)
304	1.94152e+06	PRJNA1107381	SAMN45635437	2022	Mozambique	Maputo	Rapid diagnostic test (RDT)
305	1.94153e+06	PRJNA1107381	SAMN45635438	2022-01-25	Mozambique	Maputo	Rapid diagnostic test (RDT)
306	1.94152e+06	PRJNA1107381	SAMN45635439	2022-03-08	Mozambique	Maputo	Rapid diagnostic test (RDT)
307	1941539	PRJNA1107381	SAMN45635440	2022	Mozambique	Maputo	Rapid diagnostic test (RDT)
308	1.94152e+06	PRJNA1107381	SAMN45635441	2022-03-25	Mozambique	Maputo	Rapid diagnostic test (RDT)
309	1941526	PRJNA1107381	SAMN45635442	2022	Mozambique	Maputo	Rapid diagnostic test (RDT)
310	1.94152e+06	PRJNA1107381	SAMN45635443	2022	Mozambique	Maputo	Rapid diagnostic test (RDT)
311	1.92262e+06	PRJNA1107381	SAMN45635445	2022-02-04	Mozambique	Maputo	Rapid diagnostic test (RDT)
312	1.97392e+06	PRJNA1107381	SAMN45635446	2022	Mozambique	Maputo	Rapid diagnostic test (RDT)
313	1.94155e+06	PRJNA1107381	SAMN45635447	2022-01-30	Mozambique	Maputo	Rapid diagnostic test (RDT)
314	1.94181e+06	PRJNA1107381	SAMN45635448	2022-04-06	Mozambique	Maputo	Rapid diagnostic test (RDT)
315	1.94155e+06	PRJNA1107381	SAMN45635449	2022-03-10	Mozambique	Maputo	Rapid diagnostic test (RDT)
316	1.94175e+06	PRJNA1107381	SAMN45635450	2022-05-10	Mozambique	Maputo	Rapid diagnostic test (RDT)
317	1.94177e+06	PRJNA1107381	SAMN45635451	2022	Mozambique	Maputo	Rapid diagnostic test (RDT)
318	1.94175e+06	PRJNA1107381	SAMN45635452	2022	Mozambique	Maputo	Rapid diagnostic test (RDT)
319	1.94177e+06	PRJNA1107381	SAMN45635453	2022	Mozambique	Maputo	Rapid diagnostic test (RDT)
320	1.94178e+06	PRJNA1107381	SAMN45635454	2022-01-04	Mozambique	Maputo	Rapid diagnostic test (RDT)
321	1.974e+06	PRJNA1107381	SAMN45635455	2022-04-05	Mozambique	Maputo	Rapid diagnostic test (RDT)
322	1.92254e+06	PRJNA1107381	SAMN45635456	2022	Mozambique	Maputo	Rapid diagnostic test (RDT)
323	1.94154e+06	PRJNA1107381	SAMN45635457	2022-03-07	Mozambique	Maputo	Rapid diagnostic test (RDT)
324	1.94155e+06	PRJNA1107381	SAMN45635458	2022-01-25	Mozambique	Maputo	Rapid diagnostic test (RDT)
325	1.94155e+06	PRJNA1107381	SAMN45635459	2022	Mozambique	Maputo	Rapid diagnostic test (RDT)
326	1.94157e+06	PRJNA1107381	SAMN45635460	2022-02-17	Mozambique	Maputo	Rapid diagnostic test (RDT)
327	1.97402e+06	PRJNA1107381	SAMN45635461	2022	Mozambique	Maputo	Rapid diagnostic test (RDT)
328	1.974e+06	PRJNA1107381	SAMN45635462	2022	Mozambique	Maputo	Rapid diagnostic test (RDT)
329	1.97402e+06	PRJNA1107381	SAMN45635463	2022	Mozambique	Maputo	Rapid diagnostic test (RDT)
330	1.94155e+06	PRJNA1107381	SAMN45635464	2022	Mozambique	Maputo	Rapid diagnostic test (RDT)
331	1.97402e+06	PRJNA1107381	SAMN45635465	2022	Mozambique	Maputo	Rapid diagnostic test (RDT)
332	1941584	PRJNA1107381	SAMN45635466	2022-01-31	Mozambique	Maputo	Rapid diagnostic test (RDT)
333	1.92257e+06	PRJNA1107381	SAMN45635467	2022	Mozambique	Maputo	Rapid diagnostic test (RDT)
334	1.94158e+06	PRJNA1107381	SAMN45635468	2022	Mozambique	Maputo	Rapid diagnostic test (RDT)
335	1.94159e+06	PRJNA1107381	SAMN45635469	2022-02-18	Mozambique	Maputo	Rapid diagnostic test (RDT)
336	1.94159e+06	PRJNA1107381	SAMN45635470	2022-01-24	Mozambique	Maputo	Rapid diagnostic test (RDT)
337	1.94161e+06	PRJNA1107381	SAMN45635471	2022	Mozambique	Maputo	Rapid diagnostic test (RDT)
338	1941609	PRJNA1107381	SAMN45635472	2022-05-31	Mozambique	Maputo	Rapid diagnostic test (RDT)
339	1.94162e+06	PRJNA1107381	SAMN45635473	2022	Mozambique	Maputo	Rapid diagnostic test (RDT)
340	1.94162e+06	PRJNA1107381	SAMN45635474	2022	Mozambique	Maputo	Rapid diagnostic test (RDT)
341	1.97409e+06	PRJNA1107381	SAMN45635475	2022	Mozambique	Maputo	Rapid diagnostic test (RDT)
342	1.9224e+06	PRJNA1107381	SAMN45635476	2022-01-14	Mozambique	Maputo	Rapid diagnostic test (RDT)
343	1.94169e+06	PRJNA1107381	SAMN45635477	2022	Mozambique	Maputo	Rapid diagnostic test (RDT)
344	1974027	PRJNA1107381	SAMN45635478	2022	Mozambique	Maputo	Rapid diagnostic test (RDT)
345	1.97409e+06	PRJNA1107381	SAMN45635479	2022	Mozambique	Maputo	Rapid diagnostic test (RDT)
346	1.97408e+06	PRJNA1107381	SAMN45635480	2022	Mozambique	Maputo	Rapid diagnostic test (RDT)
347	1.97409e+06	PRJNA1107381	SAMN45635481	2022	Mozambique	Maputo	Rapid diagnostic test (RDT)
348	1.94164e+06	PRJNA1107381	SAMN45635482	2022	Mozambique	Maputo	Rapid diagnostic test (RDT)
349	1.9417e+06	PRJNA1107381	SAMN45635483	2022	Mozambique	Maputo	Rapid diagnostic test (RDT)
350	1.94169e+06	PRJNA1107381	SAMN45635484	2022	Mozambique	Maputo	Rapid diagnostic test (RDT)
351	1.94174e+06	PRJNA1107381	SAMN45635485	2022-06-13	Mozambique	Maputo	Rapid diagnostic test (RDT)
352	1.92262e+06	PRJNA1107381	SAMN45635486	2022-02-04	Mozambique	Maputo	Rapid diagnostic test (RDT)
353	1.97421e+06	PRJNA1107381	SAMN45635487	2022	Mozambique	Maputo	Rapid diagnostic test (RDT)
354	1.94175e+06	PRJNA1107381	SAMN45635488	2022-03-11	Mozambique	Maputo	Rapid diagnostic test (RDT)
355	1.94171e+06	PRJNA1107381	SAMN45635489	2022-03-29	Mozambique	Maputo	Rapid diagnostic test (RDT)
356	1.94176e+06	PRJNA1107381	SAMN45635490	2022-03-08	Mozambique	Maputo	Rapid diagnostic test (RDT)
357	1.94177e+06	PRJNA1107381	SAMN45635491	2022	Mozambique	Maputo	Rapid diagnostic test (RDT)
358	1.94181e+06	PRJNA1107381	SAMN45635492	2022	Mozambique	Maputo	Rapid diagnostic test (RDT)
359	1.97393e+06	PRJNA1107381	SAMN45635493	2022	Mozambique	Maputo	Rapid diagnostic test (RDT)
360	1.92251e+06	PRJNA1107381	SAMN45635494	2022	Mozambique	Maputo	Rapid diagnostic test (RDT)
361	1.92254e+06	PRJNA1107381	SAMN45635495	2022-01-19	Mozambique	Maputo	Rapid diagnostic test (RDT)
362	1.97408e+06	PRJNA1107381	SAMN45635496	2022-05-04	Mozambique	Maputo	Rapid diagnostic test (RDT)
363	1.94177e+06	PRJNA1107381	SAMN45635497	2022	Mozambique	Maputo	Rapid diagnostic test (RDT)
364	1.97399e+06	PRJNA1107381	SAMN45635498	2022	Mozambique	Maputo	Rapid diagnostic test (RDT)
365	1.97402e+06	PRJNA1107381	SAMN45635499	2022-09-15	Mozambique	Maputo	Rapid diagnostic test (RDT)
366	1.94181e+06	PRJNA1107381	SAMN45635500	2022-04-08	Mozambique	Maputo	Rapid diagnostic test (RDT)
367	1.97401e+06	PRJNA1107381	SAMN45635501	2022	Mozambique	Maputo	Rapid diagnostic test (RDT)
368	1.97404e+06	PRJNA1107381	SAMN45635502	2022	Mozambique	Maputo	Rapid diagnostic test (RDT)
369	1.97405e+06	PRJNA1107381	SAMN45635503	2022	Mozambique	Maputo	Rapid diagnostic test (RDT)
370	1974100	PRJNA1107381	SAMN45635504	2022-08-02	Mozambique	Maputo	Rapid diagnostic test (RDT)
371	1.92257e+06	PRJNA1107381	SAMN45635505	2022-01-14	Mozambique	Maputo	Rapid diagnostic test (RDT)
372	1.97413e+06	PRJNA1107381	SAMN45635506	2022-05-11	Mozambique	Maputo	Rapid diagnostic test (RDT)
373	1.97409e+06	PRJNA1107381	SAMN45635507	2022	Mozambique	Maputo	Rapid diagnostic test (RDT)
374	1.97408e+06	PRJNA1107381	SAMN45635509	2022-05-09	Mozambique	Maputo	Rapid diagnostic test (RDT)
375	1.99009e+06	PRJNA1107381	SAMN45635510	2022	Mozambique	Maputo	Rapid diagnostic test (RDT)
376	1.97409e+06	PRJNA1107381	SAMN45635511	2022	Mozambique	Maputo	Rapid diagnostic test (RDT)
377	2.03895e+06	PRJNA1107381	SAMN45635512	2022	Mozambique	Maputo	Rapid diagnostic test (RDT)
378	1.9901e+06	PRJNA1107381	SAMN45635513	2022	Mozambique	Maputo	Rapid diagnostic test (RDT)
379	1.9741e+06	PRJNA1107381	SAMN45635514	2022	Mozambique	Maputo	Rapid diagnostic test (RDT)
380	1.92253e+06	PRJNA1107381	SAMN45635515	2022-04-11	Mozambique	Maputo	Rapid diagnostic test (RDT)
381	2.03879e+06	PRJNA1107381	SAMN45635516	2022-09-16	Mozambique	Maputo	Rapid diagnostic test (RDT)
382	1.98429e+06	PRJNA1107381	SAMN45635517	2022-03-15	Mozambique	Maputo	Rapid diagnostic test (RDT)
383	1.97417e+06	PRJNA1107381	SAMN45635518	2022-02-16	Mozambique	Maputo	Rapid diagnostic test (RDT)
384	1.97425e+06	PRJNA1107381	SAMN45635519	2022-04-11	Mozambique	Maputo	Rapid diagnostic test (RDT)
385	1.97437e+06	PRJNA1107381	SAMN45635520	2022	Mozambique	Maputo	Rapid diagnostic test (RDT)
386	1974577	PRJNA1107381	SAMN45635521	2022	Mozambique	Maputo	Rapid diagnostic test (RDT)
387	1.97461e+06	PRJNA1107381	SAMN45635522	2022	Mozambique	Maputo	Rapid diagnostic test (RDT)
388	2.03968e+06	PRJNA1107381	SAMN45635523	2022-10-01	Mozambique	Maputo	Rapid diagnostic test (RDT)
389	1922518	PRJNA1107381	SAMN45635524	2022-06-22	Mozambique	Maputo	Rapid diagnostic test (RDT)
390	2.03968e+06	PRJNA1107381	SAMN45635525	2022	Mozambique	Maputo	Rapid diagnostic test (RDT)
391	1974340	PRJNA1107381	SAMN45635526	2022-07-10	Mozambique	Maputo	Rapid diagnostic test (RDT)
392	1.97425e+06	PRJNA1107381	SAMN45635527	2022	Mozambique	Maputo	Rapid diagnostic test (RDT)
393	2.03919e+06	PRJNA1107381	SAMN45635528	2022	Mozambique	Maputo	Rapid diagnostic test (RDT)
394	1.97418e+06	PRJNA1107381	SAMN45635529	2022-03-16	Mozambique	Maputo	Rapid diagnostic test (RDT)
395	1.97453e+06	PRJNA1107381	SAMN45635530	2022-03-11	Mozambique	Maputo	Rapid diagnostic test (RDT)
396	1.98403e+06	PRJNA1107381	SAMN45635531	2022	Mozambique	Maputo	Rapid diagnostic test (RDT)
397	1974283	PRJNA1107381	SAMN45635532	2022	Mozambique	Maputo	Rapid diagnostic test (RDT)
398	1.97454e+06	PRJNA1107381	SAMN45635533	2022-05-11	Mozambique	Maputo	Rapid diagnostic test (RDT)
399	1.97454e+06	PRJNA1107381	SAMN45635534	2022	Mozambique	Maputo	Rapid diagnostic test (RDT)
400	1.92243e+06	PRJNA1107381	SAMN45635535	2022	Mozambique	Maputo	Rapid diagnostic test (RDT)
401	2.03969e+06	PRJNA1107381	SAMN45635536	2022	Mozambique	Maputo	Rapid diagnostic test (RDT)
402	2065429	PRJNA1107381	SAMN45635537	2022	Mozambique	Maputo	Rapid diagnostic test (RDT)
403	1.97453e+06	PRJNA1107381	SAMN45635538	2022	Mozambique	Maputo	Rapid diagnostic test (RDT)
404	1.97458e+06	PRJNA1107381	SAMN45635539	2022	Mozambique	Maputo	Rapid diagnostic test (RDT)
405	1.97455e+06	PRJNA1107381	SAMN45635540	2022-07-27	Mozambique	Maputo	Rapid diagnostic test (RDT)
406	1.99006e+06	PRJNA1107381	SAMN45635541	2022	Mozambique	Maputo	Rapid diagnostic test (RDT)
407	1.97442e+06	PRJNA1107381	SAMN45635542	2022	Mozambique	Maputo	Rapid diagnostic test (RDT)
408	1974535	PRJNA1107381	SAMN45635543	2022-07-01	Mozambique	Maputo	Rapid diagnostic test (RDT)
409	1.92253e+06	PRJNA1107381	SAMN45635544	2022-01-14	Mozambique	Maputo	Rapid diagnostic test (RDT)
410	1.9901e+06	PRJNA1107381	SAMN45635545	2022	Mozambique	Maputo	Rapid diagnostic test (RDT)
411	2.03896e+06	PRJNA1107381	SAMN45635546	2022	Mozambique	Maputo	Rapid diagnostic test (RDT)
412	2.03895e+06	PRJNA1107381	SAMN45635547	2022	Mozambique	Maputo	Rapid diagnostic test (RDT)
413	2.03895e+06	PRJNA1107381	SAMN45635548	2022	Mozambique	Maputo	Rapid diagnostic test (RDT)
414	1.97438e+06	PRJNA1107381	SAMN45635549	2022	Mozambique	Maputo	Rapid diagnostic test (RDT)
415	2.03897e+06	PRJNA1107381	SAMN45635550	2022	Mozambique	Maputo	Rapid diagnostic test (RDT)
416	2038968	PRJNA1107381	SAMN45635551	2022	Mozambique	Maputo	Rapid diagnostic test (RDT)
417	2.03912e+06	PRJNA1107381	SAMN45635552	2022-09-17	Mozambique	Maputo	Rapid diagnostic test (RDT)
418	2.03913e+06	PRJNA1107381	SAMN45635553	2022	Mozambique	Maputo	Rapid diagnostic test (RDT)
419	2.03917e+06	PRJNA1107381	SAMN45635554	2022	Mozambique	Maputo	Rapid diagnostic test (RDT)
420	1.9226e+06	PRJNA1107381	SAMN45635555	2022	Mozambique	Maputo	Rapid diagnostic test (RDT)
421	2.03896e+06	PRJNA1107381	SAMN45635556	2022	Mozambique	Maputo	Rapid diagnostic test (RDT)
422	2.03897e+06	PRJNA1107381	SAMN45635557	2022	Mozambique	Maputo	Rapid diagnostic test (RDT)
423	2.03918e+06	PRJNA1107381	SAMN45635558	2022	Mozambique	Maputo	Rapid diagnostic test (RDT)
424	2.03954e+06	PRJNA1107381	SAMN45635559	2022-10-03	Mozambique	Maputo	Rapid diagnostic test (RDT)
425	2.03918e+06	PRJNA1107381	SAMN45635560	2022-09-30	Mozambique	Maputo	Rapid diagnostic test (RDT)
426	2.03954e+06	PRJNA1107381	SAMN45635561	2022-09-30	Mozambique	Maputo	Rapid diagnostic test (RDT)
427	2.03919e+06	PRJNA1107381	SAMN45635562	2022-10-19	Mozambique	Maputo	Rapid diagnostic test (RDT)
428	2.03954e+06	PRJNA1107381	SAMN45635563	2022	Mozambique	Maputo	Rapid diagnostic test (RDT)
429	1.92261e+06	PRJNA1107381	SAMN45635564	2022-01-26	Mozambique	Maputo	Rapid diagnostic test (RDT)
430	2.03955e+06	PRJNA1107381	SAMN45635565	2022	Mozambique	Maputo	Rapid diagnostic test (RDT)
431	2.03955e+06	PRJNA1107381	SAMN45635566	2022	Mozambique	Maputo	Rapid diagnostic test (RDT)
432	2.03957e+06	PRJNA1107381	SAMN45635567	2022-09-27	Mozambique	Maputo	Rapid diagnostic test (RDT)
433	2.03967e+06	PRJNA1107381	SAMN45635568	2022-09-06	Mozambique	Maputo	Rapid diagnostic test (RDT)
434	1.92254e+06	PRJNA1107381	SAMN45635569	2022	Mozambique	Maputo	Rapid diagnostic test (RDT)
435	1.85239e+06	PRJNA1107381	SAMN45635570	2022-07-05	Mozambique	Maputo	Rapid diagnostic test (RDT)
436	1.92238e+06	PRJNA1107381	SAMN45635571	2022-01-11	Mozambique	Maputo	Rapid diagnostic test (RDT)
437	1.92253e+06	PRJNA1107381	SAMN45635572	2022-04-11	Mozambique	Maputo	Rapid diagnostic test (RDT)
438	1.92261e+06	PRJNA1107381	SAMN45635573	2022	Mozambique	Maputo	Rapid diagnostic test (RDT)
439	1.92855e+06	PRJNA1107381	SAMN45635574	2022	Mozambique	Maputo	Rapid diagnostic test (RDT)
440	1.92263e+06	PRJNA1107381	SAMN45635575	2022	Mozambique	Maputo	Rapid diagnostic test (RDT)
441	1.92251e+06	PRJNA1107381	SAMN45635576	2022-04-14	Mozambique	Maputo	Rapid diagnostic test (RDT)
442	1.92263e+06	PRJNA1107381	SAMN45635577	2022	Mozambique	Maputo	Rapid diagnostic test (RDT)
443	1.92261e+06	PRJNA1107381	SAMN45635578	2022	Mozambique	Maputo	Rapid diagnostic test (RDT)
444	1.92263e+06	PRJNA1107381	SAMN45635579	2022	Mozambique	Maputo	Rapid diagnostic test (RDT)
445	1922633	PRJNA1107381	SAMN45635580	2022	Mozambique	Maputo	Rapid diagnostic test (RDT)
446	1.92263e+06	PRJNA1107381	SAMN45635581	2022	Mozambique	Maputo	Rapid diagnostic test (RDT)
447	1.92261e+06	PRJNA1107381	SAMN45635582	2022	Mozambique	Maputo	Rapid diagnostic test (RDT)
448	1922646	PRJNA1107381	SAMN45635584	2022-05-04	Mozambique	Maputo	Rapid diagnostic test (RDT)
449	1.92263e+06	PRJNA1107381	SAMN45635585	2022-01-11	Mozambique	Maputo	Rapid diagnostic test (RDT)
450	1.92264e+06	PRJNA1107381	SAMN45635586	2022	Mozambique	Maputo	Rapid diagnostic test (RDT)
451	1.92265e+06	PRJNA1107381	SAMN45635587	2022-05-02	Mozambique	Maputo	Rapid diagnostic test (RDT)
452	1.92265e+06	PRJNA1107381	SAMN45635589	2022-01-26	Mozambique	Maputo	Rapid diagnostic test (RDT)
453	1.92265e+06	PRJNA1107381	SAMN45635590	2022-01-31	Mozambique	Maputo	Rapid diagnostic test (RDT)
454	1.92265e+06	PRJNA1107381	SAMN45635591	2022-05-02	Mozambique	Maputo	Rapid diagnostic test (RDT)
455	1.92266e+06	PRJNA1107381	SAMN45635592	2022	Mozambique	Maputo	Rapid diagnostic test (RDT)
456	1.92262e+06	PRJNA1107381	SAMN45635593	2022	Mozambique	Maputo	Rapid diagnostic test (RDT)
457	1.92277e+06	PRJNA1107381	SAMN45635594	2022-05-03	Mozambique	Maputo	Rapid diagnostic test (RDT)
458	1.92277e+06	PRJNA1107381	SAMN45635595	2022-04-04	Mozambique	Maputo	Rapid diagnostic test (RDT)
459	1.92277e+06	PRJNA1107381	SAMN45635596	2022	Mozambique	Maputo	Rapid diagnostic test (RDT)
460	1.92279e+06	PRJNA1107381	SAMN45635597	2022	Mozambique	Maputo	Rapid diagnostic test (RDT)
461	1.92987e+06	PRJNA1107381	SAMN45635598	2022	Mozambique	Maputo	Rapid diagnostic test (RDT)
462	1.9228e+06	PRJNA1107381	SAMN45635599	2022	Mozambique	Maputo	Rapid diagnostic test (RDT)
463	1.92288e+06	PRJNA1107381	SAMN45635600	2022	Mozambique	Maputo	Rapid diagnostic test (RDT)
464	1.92288e+06	PRJNA1107381	SAMN45635601	2022	Mozambique	Maputo	Rapid diagnostic test (RDT)
465	1.92288e+06	PRJNA1107381	SAMN45635602	2022	Mozambique	Maputo	Rapid diagnostic test (RDT)
466	1928587	PRJNA1107381	SAMN45635603	2022-04-14	Mozambique	Maputo	Rapid diagnostic test (RDT)
467	1.92253e+06	PRJNA1107381	SAMN45635604	2022-01-27	Mozambique	Maputo	Rapid diagnostic test (RDT)
468	1.9286e+06	PRJNA1107381	SAMN45635605	2022	Mozambique	Maputo	Rapid diagnostic test (RDT)
469	1.92861e+06	PRJNA1107381	SAMN45635606	2022-02-28	Mozambique	Maputo	Rapid diagnostic test (RDT)
470	1928602	PRJNA1107381	SAMN45635607	2022-04-24	Mozambique	Maputo	Rapid diagnostic test (RDT)
471	1.92996e+06	PRJNA1107381	SAMN45635608	2022	Mozambique	Maputo	Rapid diagnostic test (RDT)
472	1.9286e+06	PRJNA1107381	SAMN45635609	2022-01-21	Mozambique	Maputo	Rapid diagnostic test (RDT)
473	1.92869e+06	PRJNA1107381	SAMN45635610	2022	Mozambique	Maputo	Rapid diagnostic test (RDT)
474	1.92875e+06	PRJNA1107381	SAMN45635611	2022	Mozambique	Maputo	Rapid diagnostic test (RDT)
475	1.9287e+06	PRJNA1107381	SAMN45635612	2022	Mozambique	Maputo	Rapid diagnostic test (RDT)
476	1.85239e+06	PRJNA1107381	SAMN45635613	2022	Mozambique	Maputo	Rapid diagnostic test (RDT)
477	1.92874e+06	PRJNA1107381	SAMN45635614	2022	Mozambique	Maputo	Rapid diagnostic test (RDT)
478	1.92876e+06	PRJNA1107381	SAMN45635615	2022	Mozambique	Maputo	Rapid diagnostic test (RDT)
479	1.92984e+06	PRJNA1107381	SAMN45635616	2022	Mozambique	Maputo	Rapid diagnostic test (RDT)
480	1.92984e+06	PRJNA1107381	SAMN45635617	2022	Mozambique	Maputo	Rapid diagnostic test (RDT)
481	1.92983e+06	PRJNA1107381	SAMN45635618	2022	Mozambique	Maputo	Rapid diagnostic test (RDT)
482	1.92984e+06	PRJNA1107381	SAMN45635620	2022	Mozambique	Maputo	Rapid diagnostic test (RDT)
483	1.94143e+06	PRJNA1107381	SAMN45635621	2022	Mozambique	Maputo	Rapid diagnostic test (RDT)
484	1.92986e+06	PRJNA1107381	SAMN45635622	2022-03-18	Mozambique	Maputo	Rapid diagnostic test (RDT)
485	1.92986e+06	PRJNA1107381	SAMN45635623	2022-01-20	Mozambique	Maputo	Rapid diagnostic test (RDT)
486	1.92242e+06	PRJNA1107381	SAMN45635624	2022-01-27	Mozambique	Maputo	Rapid diagnostic test (RDT)
487	1.92984e+06	PRJNA1107381	SAMN45635625	2022-03-22	Mozambique	Maputo	Rapid diagnostic test (RDT)
488	1.92985e+06	PRJNA1107381	SAMN45635626	2022-01-25	Mozambique	Maputo	Rapid diagnostic test (RDT)
489	1.92986e+06	PRJNA1107381	SAMN45635627	2022-03-29	Mozambique	Maputo	Rapid diagnostic test (RDT)
490	1.92996e+06	PRJNA1107381	SAMN45635628	2022	Mozambique	Maputo	Rapid diagnostic test (RDT)
491	1941427	PRJNA1107381	SAMN45635629	2022	Mozambique	Maputo	Rapid diagnostic test (RDT)
492	1.92987e+06	PRJNA1107381	SAMN45635630	2022	Mozambique	Maputo	Rapid diagnostic test (RDT)
493	1.92991e+06	PRJNA1107381	SAMN45635631	2022	Mozambique	Maputo	Rapid diagnostic test (RDT)
494	1.92985e+06	PRJNA1107381	SAMN45635632	2022	Mozambique	Maputo	Rapid diagnostic test (RDT)
495	1.92996e+06	PRJNA1107381	SAMN45635633	2022	Mozambique	Maputo	Rapid diagnostic test (RDT)
496	1.92987e+06	PRJNA1107381	SAMN45635634	2022	Mozambique	Maputo	Rapid diagnostic test (RDT)
497	1.92243e+06	PRJNA1107381	SAMN45635635	2022-03-03	Mozambique	Maputo	Rapid diagnostic test (RDT)
498	1.92987e+06	PRJNA1107381	SAMN45635636	2022	Mozambique	Maputo	Rapid diagnostic test (RDT)
499	1.92987e+06	PRJNA1107381	SAMN45635637	2022-01-26	Mozambique	Maputo	Rapid diagnostic test (RDT)
500	1.92993e+06	PRJNA1107381	SAMN45635638	2022-03-25	Mozambique	Maputo	Rapid diagnostic test (RDT)
501	1.93004e+06	PRJNA1107381	SAMN45635639	2022-11-02	Mozambique	Maputo	Rapid diagnostic test (RDT)
502	1941315	PRJNA1107381	SAMN45635640	2022-04-25	Mozambique	Maputo	Rapid diagnostic test (RDT)
503	1.93004e+06	PRJNA1107381	SAMN45635641	2022	Mozambique	Maputo	Rapid diagnostic test (RDT)
504	1.92993e+06	PRJNA1107381	SAMN45635642	2022	Mozambique	Maputo	Rapid diagnostic test (RDT)
505	1.93004e+06	PRJNA1107381	SAMN45635643	2022-10-24	Mozambique	Maputo	Rapid diagnostic test (RDT)
506	1.97454e+06	PRJNA1107381	SAMN45635644	2022-09-16	Mozambique	Maputo	Rapid diagnostic test (RDT)
507	2.03969e+06	PRJNA1107381	SAMN45635645	2022	Mozambique	Maputo	Rapid diagnostic test (RDT)
508	2.08427e+06	PRJNA1107381	SAMN45635646	2022	Mozambique	Maputo	Rapid diagnostic test (RDT)
509	2.08427e+06	PRJNA1107381	SAMN45635647	2022	Mozambique	Maputo	Rapid diagnostic test (RDT)
510	2.08435e+06	PRJNA1107381	SAMN45635648	2022	Mozambique	Maputo	Rapid diagnostic test (RDT)
511	2.08429e+06	PRJNA1107381	SAMN45635649	2022	Mozambique	Maputo	Rapid diagnostic test (RDT)
512	2.08426e+06	PRJNA1107381	SAMN45635650	2022	Mozambique	Maputo	Rapid diagnostic test (RDT)
513	2.08429e+06	PRJNA1107381	SAMN45635651	2022	Mozambique	Maputo	Rapid diagnostic test (RDT)
514	2.08436e+06	PRJNA1107381	SAMN45635652	2022	Mozambique	Maputo	Rapid diagnostic test (RDT)
515	2.08429e+06	PRJNA1107381	SAMN45635653	2022	Mozambique	Maputo	Rapid diagnostic test (RDT)
516	1.85239e+06	PRJNA1107381	SAMN45635654	2022-07-09	Mozambique	Maputo	Rapid diagnostic test (RDT)
517	2.08429e+06	PRJNA1107381	SAMN45635655	2022	Mozambique	Maputo	Rapid diagnostic test (RDT)
518	2.08432e+06	PRJNA1107381	SAMN45635656	2022	Mozambique	Maputo	Rapid diagnostic test (RDT)
519	2.08433e+06	PRJNA1107381	SAMN45635658	2022	Mozambique	Maputo	Rapid diagnostic test (RDT)
520	2.08433e+06	PRJNA1107381	SAMN45635659	2022	Mozambique	Maputo	Rapid diagnostic test (RDT)
521	2.08433e+06	PRJNA1107381	SAMN45635660	2022	Mozambique	Maputo	Rapid diagnostic test (RDT)
522	1.97452e+06	PRJNA1107381	SAMN45635661	2022-03-02	Mozambique	Maputo	Rapid diagnostic test (RDT)
523	2.08433e+06	PRJNA1107381	SAMN45635662	2022	Mozambique	Maputo	Rapid diagnostic test (RDT)
524	2.08452e+06	PRJNA1107381	SAMN45635663	2022	Mozambique	Maputo	Rapid diagnostic test (RDT)
525	2.08433e+06	PRJNA1107381	SAMN45635664	2022	Mozambique	Maputo	Rapid diagnostic test (RDT)
526	2.08433e+06	PRJNA1107381	SAMN45635665	2022	Mozambique	Maputo	Rapid diagnostic test (RDT)
527	2.08452e+06	PRJNA1107381	SAMN45635666	2022	Mozambique	Maputo	Rapid diagnostic test (RDT)
528	2.08434e+06	PRJNA1107381	SAMN45635667	2022	Mozambique	Maputo	Rapid diagnostic test (RDT)
529	2084338	PRJNA1107381	SAMN45635668	2022	Mozambique	Maputo	Rapid diagnostic test (RDT)
530	1.97454e+06	PRJNA1107381	SAMN45635670	2022-07-27	Mozambique	Maputo	Rapid diagnostic test (RDT)
531	2.08434e+06	PRJNA1107381	SAMN45635671	2022	Mozambique	Maputo	Rapid diagnostic test (RDT)
532	2.08435e+06	PRJNA1107381	SAMN45635672	2022	Mozambique	Maputo	Rapid diagnostic test (RDT)
533	2.08434e+06	PRJNA1107381	SAMN45635673	2022	Mozambique	Maputo	Rapid diagnostic test (RDT)
534	2.08435e+06	PRJNA1107381	SAMN45635674	2022	Mozambique	Maputo	Rapid diagnostic test (RDT)
535	2.08435e+06	PRJNA1107381	SAMN45635675	2022	Mozambique	Maputo	Rapid diagnostic test (RDT)
536	2.08435e+06	PRJNA1107381	SAMN45635676	2022	Mozambique	Maputo	Rapid diagnostic test (RDT)
537	2.08436e+06	PRJNA1107381	SAMN45635677	2022	Mozambique	Maputo	Rapid diagnostic test (RDT)
538	1.97424e+06	PRJNA1107381	SAMN45635678	2022	Mozambique	Maputo	Rapid diagnostic test (RDT)
539	2084354	PRJNA1107381	SAMN45635679	2022	Mozambique	Maputo	Rapid diagnostic test (RDT)
540	2.08435e+06	PRJNA1107381	SAMN45635680	2022	Mozambique	Maputo	Rapid diagnostic test (RDT)
541	2.08442e+06	PRJNA1107381	SAMN45635681	2022-09-22	Mozambique	Maputo	Rapid diagnostic test (RDT)
542	2.08436e+06	PRJNA1107381	SAMN45635682	2022	Mozambique	Maputo	Rapid diagnostic test (RDT)
543	2.08442e+06	PRJNA1107381	SAMN45635683	2022-09-05	Mozambique	Maputo	Rapid diagnostic test (RDT)
544	2084424	PRJNA1107381	SAMN45635684	2022-09-26	Mozambique	Maputo	Rapid diagnostic test (RDT)
545	2.08443e+06	PRJNA1107381	SAMN45635685	2022	Mozambique	Maputo	Rapid diagnostic test (RDT)
546	1.97434e+06	PRJNA1107381	SAMN45635686	2022	Mozambique	Maputo	Rapid diagnostic test (RDT)
547	2.08443e+06	PRJNA1107381	SAMN45635687	2022-10-15	Mozambique	Maputo	Rapid diagnostic test (RDT)
548	2.08434e+06	PRJNA1107381	SAMN45635688	2022	Mozambique	Maputo	Rapid diagnostic test (RDT)
549	2.08445e+06	PRJNA1107381	SAMN45635689	2022	Mozambique	Maputo	Rapid diagnostic test (RDT)
550	2.08453e+06	PRJNA1107381	SAMN45635690	2022	Mozambique	Maputo	Rapid diagnostic test (RDT)
551	2.08459e+06	PRJNA1107381	SAMN45635691	2022	Mozambique	Maputo	Rapid diagnostic test (RDT)
552	2.08459e+06	PRJNA1107381	SAMN45635692	2022-07-07	Mozambique	Maputo	Rapid diagnostic test (RDT)
553	2.08445e+06	PRJNA1107381	SAMN45635693	2022	Mozambique	Maputo	Rapid diagnostic test (RDT)
554	2.0846e+06	PRJNA1107381	SAMN45635694	2022	Mozambique	Maputo	Rapid diagnostic test (RDT)
555	2.0846e+06	PRJNA1107381	SAMN45635695	2022	Mozambique	Maputo	Rapid diagnostic test (RDT)
556	1.97453e+06	PRJNA1107381	SAMN45635696	2022	Mozambique	Maputo	Rapid diagnostic test (RDT)
557	2.0846e+06	PRJNA1107381	SAMN45635697	2022-10-13	Mozambique	Maputo	Rapid diagnostic test (RDT)
558	2.08453e+06	PRJNA1107381	SAMN45635698	2022	Mozambique	Maputo	Rapid diagnostic test (RDT)
559	2.08452e+06	PRJNA1107381	SAMN45635699	2022	Mozambique	Maputo	Rapid diagnostic test (RDT)
560	2.08453e+06	PRJNA1107381	SAMN45635700	2022	Mozambique	Maputo	Rapid diagnostic test (RDT)
561	1.92249e+06	PRJNA1107381	SAMN45635701	2022-02-07	Mozambique	Maputo	Rapid diagnostic test (RDT)
562	1.97407e+06	PRJNA1107381	SAMN45635702	2022	Mozambique	Maputo	Rapid diagnostic test (RDT)
563	1.97425e+06	PRJNA1107381	SAMN45635703	2022	Mozambique	Maputo	Rapid diagnostic test (RDT)
564	1.92241e+06	PRJNA1107381	SAMN45635704	2022	Mozambique	Maputo	Rapid diagnostic test (RDT)
565	1.92246e+06	PRJNA1107381	SAMN45635705	2022	Mozambique	Maputo	Rapid diagnostic test (RDT)
566	1.97408e+06	PRJNA1107381	SAMN45635706	2022-04-25	Mozambique	Maputo	Rapid diagnostic test (RDT)
567	1.9225e+06	PRJNA1107381	SAMN45635707	2022-01-31	Mozambique	Maputo	Rapid diagnostic test (RDT)
568	1.92247e+06	PRJNA1107381	SAMN45635708	2022-01-10	Mozambique	Maputo	Rapid diagnostic test (RDT)
569	1.92251e+06	PRJNA1107381	SAMN45635710	2022	Mozambique	Maputo	Rapid diagnostic test (RDT)
570	1.9225e+06	PRJNA1107381	SAMN45635711	2022-02-04	Mozambique	Maputo	Rapid diagnostic test (RDT)
571	1.92251e+06	PRJNA1107381	SAMN45635712	2022-01-28	Mozambique	Maputo	Rapid diagnostic test (RDT)
572	1.92251e+06	PRJNA1107381	SAMN45635713	2022-01-21	Mozambique	Maputo	Rapid diagnostic test (RDT)
573	1.92252e+06	PRJNA1107381	SAMN45635714	2022	Mozambique	Maputo	Rapid diagnostic test (RDT)
574	1.92254e+06	PRJNA1107381	SAMN45635715	2022	Mozambique	Maputo	Rapid diagnostic test (RDT)
575	1922534	PRJNA1107381	SAMN45635716	2022-01-12	Mozambique	Maputo	Rapid diagnostic test (RDT)
576	1.97413e+06	PRJNA1107381	SAMN45635717	2022	Mozambique	Maputo	Rapid diagnostic test (RDT)
577	1.97423e+06	PRJNA1107381	SAMN45635718	2022-03-04	Mozambique	Maputo	Rapid diagnostic test (RDT)
578	1.92261e+06	PRJNA1107381	SAMN45635719	2022-01-31	Mozambique	Maputo	Rapid diagnostic test (RDT)
579	1.92265e+06	PRJNA1107381	SAMN45635720	2022-01-18	Mozambique	Maputo	Rapid diagnostic test (RDT)
580	1.92268e+06	PRJNA1107381	SAMN45635722	2022	Mozambique	Maputo	Rapid diagnostic test (RDT)
581	1.92267e+06	PRJNA1107381	SAMN45635723	2022-02-02	Mozambique	Maputo	Rapid diagnostic test (RDT)
582	1.92272e+06	PRJNA1107381	SAMN45635724	2022-03-01	Mozambique	Maputo	Rapid diagnostic test (RDT)
583	1.92277e+06	PRJNA1107381	SAMN45635725	2022-03-23	Mozambique	Maputo	Rapid diagnostic test (RDT)
584	1.92873e+06	PRJNA1107381	SAMN45635726	2022	Mozambique	Maputo	Rapid diagnostic test (RDT)
585	1.92278e+06	PRJNA1107381	SAMN45635727	2022-04-27	Mozambique	Maputo	Rapid diagnostic test (RDT)
586	1.92865e+06	PRJNA1107381	SAMN45635728	2022	Mozambique	Maputo	Rapid diagnostic test (RDT)
587	1.97454e+06	PRJNA1107381	SAMN45635729	2022	Mozambique	Maputo	Rapid diagnostic test (RDT)
588	1.92865e+06	PRJNA1107381	SAMN45635730	2022	Mozambique	Maputo	Rapid diagnostic test (RDT)
589	1.92865e+06	PRJNA1107381	SAMN45635731	2022	Mozambique	Maputo	Rapid diagnostic test (RDT)
590	1.92865e+06	PRJNA1107381	SAMN45635732	2022	Mozambique	Maputo	Rapid diagnostic test (RDT)
591	1.92868e+06	PRJNA1107381	SAMN45635733	2022-10-20	Mozambique	Maputo	Rapid diagnostic test (RDT)
592	1.92869e+06	PRJNA1107381	SAMN45635734	2022-10-03	Mozambique	Maputo	Rapid diagnostic test (RDT)
593	1928699	PRJNA1107381	SAMN45635735	2022	Mozambique	Maputo	Rapid diagnostic test (RDT)
594	1.92869e+06	PRJNA1107381	SAMN45635736	2022	Mozambique	Maputo	Rapid diagnostic test (RDT)
595	1928727	PRJNA1107381	SAMN45635737	2022	Mozambique	Maputo	Rapid diagnostic test (RDT)
596	1.97455e+06	PRJNA1107381	SAMN45635739	2022	Mozambique	Maputo	Rapid diagnostic test (RDT)
597	1.92983e+06	PRJNA1107381	SAMN45635740	2022-01-18	Mozambique	Maputo	Rapid diagnostic test (RDT)
598	1.92978e+06	PRJNA1107381	SAMN45635741	2022	Mozambique	Maputo	Rapid diagnostic test (RDT)
599	1.92986e+06	PRJNA1107381	SAMN45635742	2022-01-24	Mozambique	Maputo	Rapid diagnostic test (RDT)
600	1.92985e+06	PRJNA1107381	SAMN45635743	2022-01-15	Mozambique	Maputo	Rapid diagnostic test (RDT)
601	1.92988e+06	PRJNA1107381	SAMN45635744	2022	Mozambique	Maputo	Rapid diagnostic test (RDT)
602	1.92255e+06	PRJNA1107381	SAMN45635745	2022-04-13	Mozambique	Maputo	Rapid diagnostic test (RDT)
603	1.92254e+06	PRJNA1107381	SAMN45635746	2022	Mozambique	Maputo	Rapid diagnostic test (RDT)
604	1.9741e+06	PRJNA1107381	SAMN45635747	2022	Mozambique	Maputo	Rapid diagnostic test (RDT)
605	1.92254e+06	PRJNA1107381	SAMN45635748	2022-08-09	Mozambique	Maputo	Rapid diagnostic test (RDT)
606	1.92254e+06	PRJNA1107381	SAMN45635749	2022-01-23	Mozambique	Maputo	Rapid diagnostic test (RDT)
607	1.92873e+06	PRJNA1107381	SAMN45635751	2022	Mozambique	Maputo	Rapid diagnostic test (RDT)
608	1.92263e+06	PRJNA1107381	SAMN45635752	2022-01-03	Mozambique	Maputo	Rapid diagnostic test (RDT)
609	1922617	PRJNA1107381	SAMN45635753	2022	Mozambique	Maputo	Rapid diagnostic test (RDT)
610	1929803	PRJNA1107381	SAMN45635754	2022-06-06	Mozambique	Maputo	Rapid diagnostic test (RDT)
611	1.92864e+06	PRJNA1107381	SAMN45635755	2022	Mozambique	Maputo	Rapid diagnostic test (RDT)
612	1.92868e+06	PRJNA1107381	SAMN45635756	2022-07-19	Mozambique	Maputo	Rapid diagnostic test (RDT)
613	1.92873e+06	PRJNA1107381	SAMN45635757	2022	Mozambique	Maputo	Rapid diagnostic test (RDT)
614	1.97408e+06	PRJNA1107381	SAMN45635758	2022-04-25	Mozambique	Maputo	Rapid diagnostic test (RDT)
615	1.92261e+06	PRJNA1107381	SAMN45635759	2022	Mozambique	Maputo	Rapid diagnostic test (RDT)
616	1.92262e+06	PRJNA1107381	SAMN45635760	2022-02-02	Mozambique	Maputo	Rapid diagnostic test (RDT)
617	1.92878e+06	PRJNA1107381	SAMN45635761	2022	Mozambique	Maputo	Rapid diagnostic test (RDT)
618	1.92873e+06	PRJNA1107381	SAMN45635762	2022	Mozambique	Maputo	Rapid diagnostic test (RDT)
619	1.92263e+06	PRJNA1107381	SAMN45635763	2022	Mozambique	Maputo	Rapid diagnostic test (RDT)
620	1.92278e+06	PRJNA1107381	SAMN45635764	2022-04-30	Mozambique	Maputo	Rapid diagnostic test (RDT)
621	1.94145e+06	PRJNA1107381	SAMN45635765	2022-03-28	Mozambique	Maputo	Rapid diagnostic test (RDT)
622	1.92871e+06	PRJNA1107381	SAMN45635766	2022	Mozambique	Maputo	Rapid diagnostic test (RDT)
623	1.92875e+06	PRJNA1107381	SAMN45635767	2022	Mozambique	Maputo	Rapid diagnostic test (RDT)
624	1.92983e+06	PRJNA1107381	SAMN45635768	2022-01-24	Mozambique	Maputo	Rapid diagnostic test (RDT)
625	1.92258e+06	PRJNA1107381	SAMN45635769	2022	Mozambique	Maputo	Rapid diagnostic test (RDT)
626	1.9227e+06	PRJNA1107381	SAMN45635770	2022	Mozambique	Maputo	Rapid diagnostic test (RDT)
627	1.92861e+06	PRJNA1107381	SAMN45635771	2022-02-07	Mozambique	Maputo	Rapid diagnostic test (RDT)
628	1.92986e+06	PRJNA1107381	SAMN45635772	2022	Mozambique	Maputo	Rapid diagnostic test (RDT)
629	1.92987e+06	PRJNA1107381	SAMN45635773	2022	Mozambique	Maputo	Rapid diagnostic test (RDT)
630	1.92988e+06	PRJNA1107381	SAMN45635774	2022-01-18	Mozambique	Maputo	Rapid diagnostic test (RDT)
631	1.92853e+06	PRJNA1107381	SAMN45635775	2022	Mozambique	Maputo	Rapid diagnostic test (RDT)
632	1.97408e+06	PRJNA1107381	SAMN45635776	2022	Mozambique	Maputo	Rapid diagnostic test (RDT)
633	1929960	PRJNA1107381	SAMN45635777	2022-10-26	Mozambique	Maputo	Rapid diagnostic test (RDT)
634	1.92996e+06	PRJNA1107381	SAMN45635778	2022	Mozambique	Maputo	Rapid diagnostic test (RDT)
635	1.92992e+06	PRJNA1107381	SAMN45635779	2022	Mozambique	Maputo	Rapid diagnostic test (RDT)
636	1.93004e+06	PRJNA1107381	SAMN45635780	2022-10-03	Mozambique	Maputo	Rapid diagnostic test (RDT)
637	1.93004e+06	PRJNA1107381	SAMN45635781	2022-09-30	Mozambique	Maputo	Rapid diagnostic test (RDT)
638	1.93004e+06	PRJNA1107381	SAMN45635782	2022-10-06	Mozambique	Maputo	Rapid diagnostic test (RDT)
639	1.93004e+06	PRJNA1107381	SAMN45635783	2022	Mozambique	Maputo	Rapid diagnostic test (RDT)
640	1.94152e+06	PRJNA1107381	SAMN45635784	2022	Mozambique	Maputo	Rapid diagnostic test (RDT)
641	1.94135e+06	PRJNA1107381	SAMN45635785	2022	Mozambique	Maputo	Rapid diagnostic test (RDT)
642	1974171	PRJNA1107381	SAMN45635786	2022-02-26	Mozambique	Maputo	Rapid diagnostic test (RDT)
643	1.94142e+06	PRJNA1107381	SAMN45635787	2022-09-01	Mozambique	Maputo	Rapid diagnostic test (RDT)
644	1.94136e+06	PRJNA1107381	SAMN45635788	2022	Mozambique	Maputo	Rapid diagnostic test (RDT)
645	1.94143e+06	PRJNA1107381	SAMN45635789	2022	Mozambique	Maputo	Rapid diagnostic test (RDT)
646	1.94143e+06	PRJNA1107381	SAMN45635790	2022-01-25	Mozambique	Maputo	Rapid diagnostic test (RDT)
647	1.94143e+06	PRJNA1107381	SAMN45635791	2022-01-25	Mozambique	Maputo	Rapid diagnostic test (RDT)
648	1.94146e+06	PRJNA1107381	SAMN45635792	2022	Mozambique	Maputo	Rapid diagnostic test (RDT)
649	1.94147e+06	PRJNA1107381	SAMN45635793	2022-06-26	Mozambique	Maputo	Rapid diagnostic test (RDT)
650	1.94147e+06	PRJNA1107381	SAMN45635794	2022	Mozambique	Maputo	Rapid diagnostic test (RDT)
651	1.94149e+06	PRJNA1107381	SAMN45635795	2022	Mozambique	Maputo	Rapid diagnostic test (RDT)
652	1941498	PRJNA1107381	SAMN45635796	2022-02-08	Mozambique	Maputo	Rapid diagnostic test (RDT)
653	1.94148e+06	PRJNA1107381	SAMN45635797	2022-09-09	Mozambique	Maputo	Rapid diagnostic test (RDT)
654	1.94149e+06	PRJNA1107381	SAMN45635798	2022-03-16	Mozambique	Maputo	Rapid diagnostic test (RDT)
655	1.9415e+06	PRJNA1107381	SAMN45635799	2022	Mozambique	Maputo	Rapid diagnostic test (RDT)
656	1.94152e+06	PRJNA1107381	SAMN45635800	2022-07-04	Mozambique	Maputo	Rapid diagnostic test (RDT)
657	1.94152e+06	PRJNA1107381	SAMN45635801	2022-03-09	Mozambique	Maputo	Rapid diagnostic test (RDT)
658	1.94153e+06	PRJNA1107381	SAMN45635803	2022-07-25	Mozambique	Maputo	Rapid diagnostic test (RDT)
659	1.94153e+06	PRJNA1107381	SAMN45635804	2022-06-27	Mozambique	Maputo	Rapid diagnostic test (RDT)
660	1.94153e+06	PRJNA1107381	SAMN45635805	2022-07-07	Mozambique	Maputo	Rapid diagnostic test (RDT)
661	1.94153e+06	PRJNA1107381	SAMN45635806	2022	Mozambique	Maputo	Rapid diagnostic test (RDT)
662	1.94153e+06	PRJNA1107381	SAMN45635807	2022-02-16	Mozambique	Maputo	Rapid diagnostic test (RDT)
663	1941542	PRJNA1107381	SAMN45635808	2022	Mozambique	Maputo	Rapid diagnostic test (RDT)
664	1.94156e+06	PRJNA1107381	SAMN45635809	2022-03-06	Mozambique	Maputo	Rapid diagnostic test (RDT)
665	1.94157e+06	PRJNA1107381	SAMN45635810	2022-02-22	Mozambique	Maputo	Rapid diagnostic test (RDT)
666	1.94157e+06	PRJNA1107381	SAMN45635811	2022	Mozambique	Maputo	Rapid diagnostic test (RDT)
667	1.97453e+06	PRJNA1107381	SAMN45635812	2022-06-09	Mozambique	Maputo	Rapid diagnostic test (RDT)
668	1.97455e+06	PRJNA1107381	SAMN45635813	2022-09-27	Mozambique	Maputo	Rapid diagnostic test (RDT)
669	1941568	PRJNA1107381	SAMN45635814	2022	Mozambique	Maputo	Rapid diagnostic test (RDT)
670	1941571	PRJNA1107381	SAMN45635815	2022-01-17	Mozambique	Maputo	Rapid diagnostic test (RDT)
671	1.94159e+06	PRJNA1107381	SAMN45635816	2022	Mozambique	Maputo	Rapid diagnostic test (RDT)
672	1.94159e+06	PRJNA1107381	SAMN45635817	2022	Mozambique	Maputo	Rapid diagnostic test (RDT)
673	1.94159e+06	PRJNA1107381	SAMN45635818	2022-02-09	Mozambique	Maputo	Rapid diagnostic test (RDT)
674	1.94159e+06	PRJNA1107381	SAMN45635819	2022-03-28	Mozambique	Maputo	Rapid diagnostic test (RDT)
675	1.9416e+06	PRJNA1107381	SAMN45635821	2022-03-30	Mozambique	Maputo	Rapid diagnostic test (RDT)
676	1.9416e+06	PRJNA1107381	SAMN45635822	2022-02-17	Mozambique	Maputo	Rapid diagnostic test (RDT)
677	1.94172e+06	PRJNA1107381	SAMN45635823	2022	Mozambique	Maputo	Rapid diagnostic test (RDT)
678	1.92262e+06	PRJNA1107381	SAMN45635824	2022	Mozambique	Maputo	Rapid diagnostic test (RDT)
679	1.94171e+06	PRJNA1107381	SAMN45635825	2022-03-04	Mozambique	Maputo	Rapid diagnostic test (RDT)
680	1.94173e+06	PRJNA1107381	SAMN45635826	2022-04-05	Mozambique	Maputo	Rapid diagnostic test (RDT)
681	1.9417e+06	PRJNA1107381	SAMN45635827	2022	Mozambique	Maputo	Rapid diagnostic test (RDT)
682	1.94173e+06	PRJNA1107381	SAMN45635828	2022	Mozambique	Maputo	Rapid diagnostic test (RDT)
683	1.94176e+06	PRJNA1107381	SAMN45635829	2022	Mozambique	Maputo	Rapid diagnostic test (RDT)
684	1.94178e+06	PRJNA1107381	SAMN45635830	2022	Mozambique	Maputo	Rapid diagnostic test (RDT)
685	1.9418e+06	PRJNA1107381	SAMN45635831	2022	Mozambique	Maputo	Rapid diagnostic test (RDT)
686	1.97408e+06	PRJNA1107381	SAMN45635832	2022	Mozambique	Maputo	Rapid diagnostic test (RDT)
687	1.94181e+06	PRJNA1107381	SAMN45635833	2022-02-25	Mozambique	Maputo	Rapid diagnostic test (RDT)
688	1.94179e+06	PRJNA1107381	SAMN45635835	2022	Mozambique	Maputo	Rapid diagnostic test (RDT)
689	1974014	PRJNA1107381	SAMN45635836	2022	Mozambique	Maputo	Rapid diagnostic test (RDT)
690	1.974e+06	PRJNA1107381	SAMN45635837	2022	Mozambique	Maputo	Rapid diagnostic test (RDT)
691	1.97404e+06	PRJNA1107381	SAMN45635838	2022	Mozambique	Maputo	Rapid diagnostic test (RDT)
692	1.97392e+06	PRJNA1107381	SAMN45635839	2022	Mozambique	Maputo	Rapid diagnostic test (RDT)
693	1.97401e+06	PRJNA1107381	SAMN45635840	2022	Mozambique	Maputo	Rapid diagnostic test (RDT)
694	1.97405e+06	PRJNA1107381	SAMN45635841	2022	Mozambique	Maputo	Rapid diagnostic test (RDT)
695	1.97425e+06	PRJNA1107381	SAMN45635842	2022	Mozambique	Maputo	Rapid diagnostic test (RDT)
696	1.97407e+06	PRJNA1107381	SAMN45635843	2022	Mozambique	Maputo	Rapid diagnostic test (RDT)
697	1.97403e+06	PRJNA1107381	SAMN45635844	2022	Mozambique	Maputo	Rapid diagnostic test (RDT)
698	1.97453e+06	PRJNA1107381	SAMN45635845	2022	Mozambique	Maputo	Rapid diagnostic test (RDT)
699	1.97455e+06	PRJNA1107381	SAMN45635846	2022-09-27	Mozambique	Maputo	Rapid diagnostic test (RDT)
700	1.97455e+06	PRJNA1107381	SAMN45635847	2022-09-27	Mozambique	Maputo	Rapid diagnostic test (RDT)
701	1974548	PRJNA1107381	SAMN45635848	2022-09-28	Mozambique	Maputo	Rapid diagnostic test (RDT)
702	1.97459e+06	PRJNA1107381	SAMN45635849	2022-02-08	Mozambique	Maputo	Rapid diagnostic test (RDT)
703	1974580	PRJNA1107381	SAMN45635850	2022	Mozambique	Maputo	Rapid diagnostic test (RDT)
704	1.97453e+06	PRJNA1107381	SAMN45635851	2022-06-27	Mozambique	Maputo	Rapid diagnostic test (RDT)
705	1.98408e+06	PRJNA1107381	SAMN45635852	2022-10-09	Mozambique	Maputo	Rapid diagnostic test (RDT)
706	1.97458e+06	PRJNA1107381	SAMN45635853	2022-06-23	Mozambique	Maputo	Rapid diagnostic test (RDT)
707	1.98412e+06	PRJNA1107381	SAMN45635854	2022	Mozambique	Maputo	Rapid diagnostic test (RDT)
708	1.98403e+06	PRJNA1107381	SAMN45635855	2022	Mozambique	Maputo	Rapid diagnostic test (RDT)
709	1.98419e+06	PRJNA1107381	SAMN45635856	2022	Mozambique	Maputo	Rapid diagnostic test (RDT)
710	1.98419e+06	PRJNA1107381	SAMN45635857	2022	Mozambique	Maputo	Rapid diagnostic test (RDT)
711	1.98432e+06	PRJNA1107381	SAMN45635858	2022	Mozambique	Maputo	Rapid diagnostic test (RDT)
712	1.98429e+06	PRJNA1107381	SAMN45635859	2022-04-21	Mozambique	Maputo	Rapid diagnostic test (RDT)
713	1.98432e+06	PRJNA1107381	SAMN45635860	2022	Mozambique	Maputo	Rapid diagnostic test (RDT)
714	1.98434e+06	PRJNA1107381	SAMN45635861	2022	Mozambique	Maputo	Rapid diagnostic test (RDT)
715	1.97453e+06	PRJNA1107381	SAMN45635862	2022-03-15	Mozambique	Maputo	Rapid diagnostic test (RDT)
716	1.98434e+06	PRJNA1107381	SAMN45635863	2022	Mozambique	Maputo	Rapid diagnostic test (RDT)
717	1.98439e+06	PRJNA1107381	SAMN45635865	2022-05-31	Mozambique	Maputo	Rapid diagnostic test (RDT)
718	2.03879e+06	PRJNA1107381	SAMN45635866	2022	Mozambique	Maputo	Rapid diagnostic test (RDT)
719	1990094	PRJNA1107381	SAMN45635867	2022	Mozambique	Maputo	Rapid diagnostic test (RDT)
720	1.99012e+06	PRJNA1107381	SAMN45635868	2022-02-09	Mozambique	Maputo	Rapid diagnostic test (RDT)
721	2.03879e+06	PRJNA1107381	SAMN45635869	2022	Mozambique	Maputo	Rapid diagnostic test (RDT)
722	1.99012e+06	PRJNA1107381	SAMN45635870	2022-02-09	Mozambique	Maputo	Rapid diagnostic test (RDT)
723	1974254	PRJNA1107381	SAMN45635871	2022-04-25	Mozambique	Maputo	Rapid diagnostic test (RDT)
724	2038955	PRJNA1107381	SAMN45635872	2022	Mozambique	Maputo	Rapid diagnostic test (RDT)
725	2.03896e+06	PRJNA1107381	SAMN45635873	2022	Mozambique	Maputo	Rapid diagnostic test (RDT)
726	2.03913e+06	PRJNA1107381	SAMN45635874	2022-10-11	Mozambique	Maputo	Rapid diagnostic test (RDT)
727	2.03897e+06	PRJNA1107381	SAMN45635875	2022	Mozambique	Maputo	Rapid diagnostic test (RDT)
728	2.03913e+06	PRJNA1107381	SAMN45635876	2022	Mozambique	Maputo	Rapid diagnostic test (RDT)
729	2.03917e+06	PRJNA1107381	SAMN45635877	2022	Mozambique	Maputo	Rapid diagnostic test (RDT)
730	2.03912e+06	PRJNA1107381	SAMN45635878	2022	Mozambique	Maputo	Rapid diagnostic test (RDT)
731	2039172	PRJNA1107381	SAMN45635879	2022	Mozambique	Maputo	Rapid diagnostic test (RDT)
732	2.03956e+06	PRJNA1107381	SAMN45635880	2022	Mozambique	Maputo	Rapid diagnostic test (RDT)
733	1974085	PRJNA1107381	SAMN45635881	2022-04-14	Mozambique	Maputo	Rapid diagnostic test (RDT)
734	2.03918e+06	PRJNA1107381	SAMN45635882	2022-10-23	Mozambique	Maputo	Rapid diagnostic test (RDT)
735	2.03917e+06	PRJNA1107381	SAMN45635883	2022-10-24	Mozambique	Maputo	Rapid diagnostic test (RDT)
736	2.03918e+06	PRJNA1107381	SAMN45635884	2022-10-24	Mozambique	Maputo	Rapid diagnostic test (RDT)
737	2.03918e+06	PRJNA1107381	SAMN45635885	2022-10-21	Mozambique	Maputo	Rapid diagnostic test (RDT)
738	2.03918e+06	PRJNA1107381	SAMN45635886	2022	Mozambique	Maputo	Rapid diagnostic test (RDT)
739	2039185	PRJNA1107381	SAMN45635887	2022-10-21	Mozambique	Maputo	Rapid diagnostic test (RDT)
740	2.03919e+06	PRJNA1107381	SAMN45635888	2022-10-18	Mozambique	Maputo	Rapid diagnostic test (RDT)
741	2.03918e+06	PRJNA1107381	SAMN45635889	2022-10-21	Mozambique	Maputo	Rapid diagnostic test (RDT)
742	2.03919e+06	PRJNA1107381	SAMN45635890	2022	Mozambique	Maputo	Rapid diagnostic test (RDT)
743	1.97425e+06	PRJNA1107381	SAMN45635891	2022	Mozambique	Maputo	Rapid diagnostic test (RDT)
744	2.08429e+06	PRJNA1107381	SAMN45635892	2022	Mozambique	Maputo	Rapid diagnostic test (RDT)
745	2.03921e+06	PRJNA1107381	SAMN45635893	2022-10-01	Mozambique	Maputo	Rapid diagnostic test (RDT)
746	2.0395e+06	PRJNA1107381	SAMN45635894	2022-07-06	Mozambique	Maputo	Rapid diagnostic test (RDT)
747	2.0395e+06	PRJNA1107381	SAMN45635895	2022	Mozambique	Maputo	Rapid diagnostic test (RDT)
748	2.03954e+06	PRJNA1107381	SAMN45635896	2022-10-27	Mozambique	Maputo	Rapid diagnostic test (RDT)
749	2.03954e+06	PRJNA1107381	SAMN45635898	2022	Mozambique	Maputo	Rapid diagnostic test (RDT)
750	2.03955e+06	PRJNA1107381	SAMN45635899	2022	Mozambique	Maputo	Rapid diagnostic test (RDT)
751	1.97409e+06	PRJNA1107381	SAMN45635900	2022	Mozambique	Maputo	Rapid diagnostic test (RDT)
752	2039549	PRJNA1107381	SAMN45635901	2022	Mozambique	Maputo	Rapid diagnostic test (RDT)
753	2039552	PRJNA1107381	SAMN45635902	2022-05-20	Mozambique	Maputo	Rapid diagnostic test (RDT)
754	2.03955e+06	PRJNA1107381	SAMN45635903	2022	Mozambique	Maputo	Rapid diagnostic test (RDT)
755	2.03955e+06	PRJNA1107381	SAMN45635904	2022	Mozambique	Maputo	Rapid diagnostic test (RDT)
756	2.03968e+06	PRJNA1107381	SAMN45635905	2022-09-05	Mozambique	Maputo	Rapid diagnostic test (RDT)
757	2.03956e+06	PRJNA1107381	SAMN45635906	2022	Mozambique	Maputo	Rapid diagnostic test (RDT)
758	2.03968e+06	PRJNA1107381	SAMN45635907	2022	Mozambique	Maputo	Rapid diagnostic test (RDT)
759	2.03917e+06	PRJNA1107381	SAMN45635911	2022	Mozambique	Maputo	Rapid diagnostic test (RDT)
760	2.03919e+06	PRJNA1107381	SAMN45635912	2022	Mozambique	Maputo	Rapid diagnostic test (RDT)
761	1.97409e+06	PRJNA1107381	SAMN45635916	2022	Mozambique	Maputo	Rapid diagnostic test (RDT)
762	1.97401e+06	PRJNA1107381	SAMN45635917	2022	Mozambique	Maputo	Rapid diagnostic test (RDT)
763	1.94151e+06	PRJNA1107381	SAMN45635918	2022-03-25	Mozambique	Maputo	Rapid diagnostic test (RDT)
764	1.97425e+06	PRJNA1107381	SAMN45635919	2022	Mozambique	Maputo	Rapid diagnostic test (RDT)
765	1.97403e+06	PRJNA1107381	SAMN45635920	2022	Mozambique	Maputo	Rapid diagnostic test (RDT)
766	1.97402e+06	PRJNA1107381	SAMN45635921	2022	Mozambique	Maputo	Rapid diagnostic test (RDT)
767	1.94149e+06	PRJNA1107381	SAMN45635922	2022	Mozambique	Maputo	Rapid diagnostic test (RDT)
768	1.97406e+06	PRJNA1107381	SAMN45635923	2022	Mozambique	Maputo	Rapid diagnostic test (RDT)
769	1.94159e+06	PRJNA1107381	SAMN45635924	2022	Mozambique	Maputo	Rapid diagnostic test (RDT)
770	1.9901e+06	PRJNA1107381	SAMN45635925	2022	Mozambique	Maputo	Rapid diagnostic test (RDT)
771	1.97453e+06	PRJNA1107381	SAMN45635926	2022	Mozambique	Maputo	Rapid diagnostic test (RDT)
772	2.03879e+06	PRJNA1107381	SAMN45635927	2022	Mozambique	Maputo	Rapid diagnostic test (RDT)
773	2.03954e+06	PRJNA1107381	SAMN45635928	2022	Mozambique	Maputo	Rapid diagnostic test (RDT)
774	2.0843e+06	PRJNA1107381	SAMN45635929	2022	Mozambique	Maputo	Rapid diagnostic test (RDT)
775	2.08433e+06	PRJNA1107381	SAMN45635930	2022	Mozambique	Maputo	Rapid diagnostic test (RDT)
776	1.92859e+06	PRJNA1107381	SAMN45635931	2022-01-22	Mozambique	Maputo	Rapid diagnostic test (RDT)
777	1.93939e+06	PRJNA1107381	SAMN41181495	2022-03-02	Mozambique	Maputo	dried blood spot
778	1.9394e+06	PRJNA1107381	SAMN41181497	2022-05-03	Mozambique	Maputo	dried blood spot
779	1.93967e+06	PRJNA1107381	SAMN41181508	2022-05-13	Mozambique	Maputo	dried blood spot
780	1.93933e+06	PRJNA1107381	SAMN41181491	2022-03-06	Mozambique	Maputo	dried blood spot
781	1.9393e+06	PRJNA1107381	SAMN41181490	2022-04-04	Mozambique	Maputo	dried blood spot
782	1.93942e+06	PRJNA1107381	SAMN41181498	2022-03-08	Mozambique	Maputo	dried blood spot
783	1.93944e+06	PRJNA1107381	SAMN41181501	2022-03-08	Mozambique	Maputo	dried blood spot
784	1.93964e+06	PRJNA1107381	SAMN41181507	2022-05-10	Mozambique	Maputo	dried blood spot
785	1.93964e+06	PRJNA1107381	SAMN41181506	2022-05-09	Mozambique	Maputo	dried blood spot
786	1.93958e+06	PRJNA1107381	SAMN41181502	2022-03-07	Mozambique	Maputo	dried blood spot
787	1.93963e+06	PRJNA1107381	SAMN41181505	2022-04-22	Mozambique	Maputo	dried blood spot
788	1940367	PRJNA1107381	SAMN41181510	2022-03-25	Mozambique	Maputo	dried blood spot
789	1.93967e+06	PRJNA1107381	SAMN41181509	2022-05-06	Mozambique	Maputo	dried blood spot
790	1.93943e+06	PRJNA1107381	SAMN41181499	2022-03-25	Mozambique	Maputo	dried blood spot
791	1.93962e+06	PRJNA1107381	SAMN41181503	2022-05-11	Mozambique	Maputo	dried blood spot
792	1.9393e+06	PRJNA1107381	SAMN41181489	2022-04-12	Mozambique	Maputo	dried blood spot
793	1.93939e+06	PRJNA1107381	SAMN41181496	2022-03-02	Mozambique	Maputo	dried blood spot
794	1.97851e+06	PRJNA1107381	SAMN41181512	2022-05-05	Mozambique	Maputo	dried blood spot
795	1.93967e+06	PRJNA1107381	SAMN41181522	2022-05-12	Mozambique	Maputo	dried blood spot
796	1.97914e+06	PRJNA1107381	SAMN41181516	2022-04-12	Mozambique	Maputo	dried blood spot
797	1.93934e+06	PRJNA1107381	SAMN41181494	2022-04-25	Mozambique	Maputo	dried blood spot
798	1.9786e+06	PRJNA1107381	SAMN41181513	2022-04-22	Mozambique	Maputo	dried blood spot
799	1.93399e+06	PRJNA1107381	SAMN41181987	2022-01-31	Mozambique	Zambezia	dried blood spot
800	1.93357e+06	PRJNA1107381	SAMN41181959	2022-02-04	Mozambique	Zambezia	dried blood spot
801	1.93706e+06	PRJNA1107381	SAMN41181784	2022-03-29	Mozambique	Sofala	dried blood spot
802	1.93604e+06	PRJNA1107381	SAMN41181272	2022-03-30	Mozambique	Inhambane	dried blood spot
803	1.93956e+06	PRJNA1107381	SAMN41181537	2022-05-05	Mozambique	Maputo	dried blood spot
804	1.93604e+06	PRJNA1107381	SAMN41181271	2022-05-30	Mozambique	Inhambane	dried blood spot
805	1.93694e+06	PRJNA1107381	SAMN41181782	2022-03-18	Mozambique	Sofala	dried blood spot
806	1.93707e+06	PRJNA1107381	SAMN41181785	2022-05-30	Mozambique	Sofala	dried blood spot
807	1.93631e+06	PRJNA1107381	SAMN41181775	2022-03-30	Mozambique	Sofala	dried blood spot
808	1.93963e+06	PRJNA1107381	SAMN41181542	2022-04-19	Mozambique	Maputo	dried blood spot
809	1.93865e+06	PRJNA1107381	SAMN41181276	2022-05-23	Mozambique	Inhambane	dried blood spot
810	1.9386e+06	PRJNA1107381	SAMN41181274	2022-05-23	Mozambique	Inhambane	dried blood spot
811	1.93708e+06	PRJNA1107381	SAMN41181787	2022-05-18	Mozambique	Sofala	dried blood spot
812	1.93874e+06	PRJNA1107381	SAMN41181279	2022-03-28	Mozambique	Inhambane	dried blood spot
813	1938627	PRJNA1107381	SAMN41181275	2022-03-18	Mozambique	Inhambane	dried blood spot
814	1.93708e+06	PRJNA1107381	SAMN41181788	2022-05-18	Mozambique	Sofala	dried blood spot
815	1.93879e+06	PRJNA1107381	SAMN41181282	2022-03-24	Mozambique	Inhambane	dried blood spot
816	1938739	PRJNA1107381	SAMN41181280	2022-03-28	Mozambique	Inhambane	dried blood spot
817	1.93874e+06	PRJNA1107381	SAMN41181281	2022-03-28	Mozambique	Inhambane	dried blood spot
818	1.93881e+06	PRJNA1107381	SAMN41181284	2022-03-28	Mozambique	Inhambane	dried blood spot
819	1.93884e+06	PRJNA1107381	SAMN41181285	2022-04-14	Mozambique	Inhambane	dried blood spot
820	1.9393e+06	PRJNA1107381	SAMN41181523	2022-03-07	Mozambique	Maputo	dried blood spot
821	1.94201e+06	PRJNA1107381	SAMN41181795	2022-03-21	Mozambique	Sofala	dried blood spot
822	1.93931e+06	PRJNA1107381	SAMN41181524	2022-04-29	Mozambique	Maputo	dried blood spot
823	1.93933e+06	PRJNA1107381	SAMN41181526	2022-05-09	Mozambique	Maputo	dried blood spot
824	1.93934e+06	PRJNA1107381	SAMN41181527	2022-04-22	Mozambique	Maputo	dried blood spot
825	1.93939e+06	PRJNA1107381	SAMN41181531	2022-04-04	Mozambique	Maputo	dried blood spot
826	1.93937e+06	PRJNA1107381	SAMN41181528	2022-04-29	Mozambique	Maputo	dried blood spot
827	1.93937e+06	PRJNA1107381	SAMN41181529	2022-04-29	Mozambique	Maputo	dried blood spot
828	1.93938e+06	PRJNA1107381	SAMN41181530	2022-05-03	Mozambique	Maputo	dried blood spot
829	1.9334e+06	PRJNA1107381	SAMN41181957	2022-01-27	Mozambique	Zambezia	dried blood spot
830	1942433	PRJNA1107381	SAMN41181800	2022-05-04	Mozambique	Sofala	dried blood spot
831	1.9394e+06	PRJNA1107381	SAMN41181532	2022-03-31	Mozambique	Maputo	dried blood spot
832	1.9394e+06	PRJNA1107381	SAMN41181533	2022-05-11	Mozambique	Maputo	dried blood spot
833	1.93943e+06	PRJNA1107381	SAMN41181535	2022-05-06	Mozambique	Maputo	dried blood spot
834	1.93956e+06	PRJNA1107381	SAMN41181538	2022-04-08	Mozambique	Maputo	dried blood spot
835	1.93946e+06	PRJNA1107381	SAMN41181536	2022-04-04	Mozambique	Maputo	dried blood spot
836	1.93947e+06	PRJNA1107381	SAMN41181517	2022-04-19	Mozambique	Maputo	dried blood spot
837	1.93959e+06	PRJNA1107381	SAMN41181539	2022-04-19	Mozambique	Maputo	dried blood spot
838	1.93961e+06	PRJNA1107381	SAMN41181541	2022-04-11	Mozambique	Maputo	dried blood spot
839	1.9336e+06	PRJNA1107381	SAMN41181965	2022-01-25	Mozambique	Zambezia	dried blood spot
840	1939633	PRJNA1107381	SAMN41181544	2022-03-31	Mozambique	Maputo	dried blood spot
841	1.93963e+06	PRJNA1107381	SAMN41181543	2022-04-14	Mozambique	Maputo	dried blood spot
842	1.94018e+06	PRJNA1107381	SAMN41181545	2022-03-07	Mozambique	Maputo	dried blood spot
843	1.93967e+06	PRJNA1107381	SAMN41181521	2022-04-29	Mozambique	Maputo	dried blood spot
844	1.94032e+06	PRJNA1107381	SAMN41181546	2022-05-06	Mozambique	Maputo	dried blood spot
845	1.94185e+06	PRJNA1107381	SAMN41181789	2022-03-23	Mozambique	Sofala	dried blood spot
846	1.94052e+06	PRJNA1107381	SAMN41181547	2022-03-21	Mozambique	Maputo	dried blood spot
847	1.94191e+06	PRJNA1107381	SAMN41181791	2022-03-18	Mozambique	Sofala	dried blood spot
848	1.93359e+06	PRJNA1107381	SAMN41181963	2022-01-25	Mozambique	Zambezia	dried blood spot
849	1.94192e+06	PRJNA1107381	SAMN41181792	2022-03-22	Mozambique	Sofala	dried blood spot
850	1.94212e+06	PRJNA1107381	SAMN41181796	2022-03-29	Mozambique	Sofala	dried blood spot
851	1942011	PRJNA1107381	SAMN41181794	2022-03-22	Mozambique	Sofala	dried blood spot
852	1.94212e+06	PRJNA1107381	SAMN41181797	2022-03-18	Mozambique	Sofala	dried blood spot
853	1942251	PRJNA1107381	SAMN41181798	2022-03-22	Mozambique	Sofala	dried blood spot
854	1.9424e+06	PRJNA1107381	SAMN41181799	2022-03-21	Mozambique	Sofala	dried blood spot
855	1.94275e+06	PRJNA1107381	SAMN41181807	2022-05-31	Mozambique	Sofala	dried blood spot
856	1.94259e+06	PRJNA1107381	SAMN41181804	2022-03-23	Mozambique	Sofala	dried blood spot
857	1.94269e+06	PRJNA1107381	SAMN41181805	2022-04-12	Mozambique	Sofala	dried blood spot
858	1.93339e+06	PRJNA1107381	SAMN41181954	2022-01-24	Mozambique	Zambezia	dried blood spot
859	1.94247e+06	PRJNA1107381	SAMN41181803	2022-06-18	Mozambique	Sofala	dried blood spot
860	1.94244e+06	PRJNA1107381	SAMN41181801	2022-05-04	Mozambique	Sofala	dried blood spot
861	1.94244e+06	PRJNA1107381	SAMN41181802	2022-05-04	Mozambique	Sofala	dried blood spot
862	1.94274e+06	PRJNA1107381	SAMN41181806	2022-05-31	Mozambique	Sofala	dried blood spot
863	1.9588e+06	PRJNA1107381	SAMN41181678	2022-03-24	Mozambique	Niassa	dried blood spot
864	1.95891e+06	PRJNA1107381	SAMN41181682	2022-03-24	Mozambique	Niassa	dried blood spot
865	1.95891e+06	PRJNA1107381	SAMN41181681	2022-03-28	Mozambique	Niassa	dried blood spot
866	1.95892e+06	PRJNA1107381	SAMN41181683	2022-04-11	Mozambique	Niassa	dried blood spot
867	1.93363e+06	PRJNA1107381	SAMN41181974	2022-02-03	Mozambique	Zambezia	dried blood spot
868	1.95921e+06	PRJNA1107381	SAMN41181685	2022-03-22	Mozambique	Niassa	dried blood spot
869	1959206	PRJNA1107381	SAMN41181684	2022-03-22	Mozambique	Niassa	dried blood spot
870	1.9597e+06	PRJNA1107381	SAMN41181694	2022-03-18	Mozambique	Niassa	dried blood spot
871	1.95958e+06	PRJNA1107381	SAMN41181692	2022-04-21	Mozambique	Niassa	dried blood spot
872	1.96032e+06	PRJNA1107381	SAMN41181696	2022-04-04	Mozambique	Niassa	dried blood spot
873	1.96031e+06	PRJNA1107381	SAMN41181695	2022-03-31	Mozambique	Niassa	dried blood spot
874	1.9594e+06	PRJNA1107381	SAMN41181688	2022-03-18	Mozambique	Niassa	dried blood spot
875	1.95926e+06	PRJNA1107381	SAMN41181686	2022-03-22	Mozambique	Niassa	dried blood spot
876	1.95957e+06	PRJNA1107381	SAMN41181691	2022-04-07	Mozambique	Niassa	dried blood spot
877	1.95959e+06	PRJNA1107381	SAMN41181693	2022-03-16	Mozambique	Niassa	dried blood spot
878	1.93366e+06	PRJNA1107381	SAMN41181977	2022-02-08	Mozambique	Zambezia	dried blood spot
879	1961553	PRJNA1107381	SAMN41181327	2022-03-09	Mozambique	Manica	dried blood spot
880	1.95957e+06	PRJNA1107381	SAMN41181690	2022-04-06	Mozambique	Niassa	dried blood spot
881	1.95943e+06	PRJNA1107381	SAMN41181689	2022-03-22	Mozambique	Niassa	dried blood spot
882	1.962e+06	PRJNA1107381	SAMN41181331	2022-04-21	Mozambique	Manica	dried blood spot
883	1.96038e+06	PRJNA1107381	SAMN41181697	2022-03-28	Mozambique	Niassa	dried blood spot
884	1.96187e+06	PRJNA1107381	SAMN41181329	2022-04-11	Mozambique	Manica	dried blood spot
885	1.96039e+06	PRJNA1107381	SAMN41181698	2022-04-13	Mozambique	Niassa	dried blood spot
886	1.96039e+06	PRJNA1107381	SAMN41181700	2022-03-30	Mozambique	Niassa	dried blood spot
887	1.95939e+06	PRJNA1107381	SAMN41181687	2022-03-17	Mozambique	Niassa	dried blood spot
888	1.9604e+06	PRJNA1107381	SAMN41181701	2022-04-22	Mozambique	Niassa	dried blood spot
889	1.96039e+06	PRJNA1107381	SAMN41181699	2022-03-28	Mozambique	Niassa	dried blood spot
890	1.96154e+06	PRJNA1107381	SAMN41181326	2022-03-08	Mozambique	Manica	dried blood spot
891	1.9604e+06	PRJNA1107381	SAMN41181702	2022-04-06	Mozambique	Niassa	dried blood spot
892	1.9605e+06	PRJNA1107381	SAMN41181705	2022-03-23	Mozambique	Niassa	dried blood spot
893	1.96238e+06	PRJNA1107381	SAMN41181334	2022-03-21	Mozambique	Manica	dried blood spot
894	1.9604e+06	PRJNA1107381	SAMN41181703	2022-04-04	Mozambique	Niassa	dried blood spot
895	1.96246e+06	PRJNA1107381	SAMN41181335	2022-03-21	Mozambique	Manica	dried blood spot
896	1933721	PRJNA1107381	SAMN41181981	2022-02-01	Mozambique	Zambezia	dried blood spot
897	1.96052e+06	PRJNA1107381	SAMN41181708	2022-03-28	Mozambique	Niassa	dried blood spot
898	1.96272e+06	PRJNA1107381	SAMN41181342	2022-03-10	Mozambique	Manica	dried blood spot
899	1.96044e+06	PRJNA1107381	SAMN41181704	2022-04-05	Mozambique	Niassa	dried blood spot
900	1960589	PRJNA1107381	SAMN41181709	2022-04-06	Mozambique	Niassa	dried blood spot
901	1.96263e+06	PRJNA1107381	SAMN41181340	2022-03-24	Mozambique	Manica	dried blood spot
902	1.96082e+06	PRJNA1107381	SAMN41181711	2022-03-18	Mozambique	Niassa	dried blood spot
903	1.96333e+06	PRJNA1107381	SAMN41181349	2022-03-16	Mozambique	Manica	dried blood spot
904	1.96344e+06	PRJNA1107381	SAMN41181351	2022-03-15	Mozambique	Manica	dried blood spot
905	1.96111e+06	PRJNA1107381	SAMN41181715	2022-03-28	Mozambique	Niassa	dried blood spot
906	1.96114e+06	PRJNA1107381	SAMN41181718	2022-04-21	Mozambique	Niassa	dried blood spot
907	1.96114e+06	PRJNA1107381	SAMN41181717	2022-04-25	Mozambique	Niassa	dried blood spot
908	1.96106e+06	PRJNA1107381	SAMN41181714	2022-03-22	Mozambique	Niassa	dried blood spot
909	1.96115e+06	PRJNA1107381	SAMN41181719	2022-04-18	Mozambique	Niassa	dried blood spot
910	1961160	PRJNA1107381	SAMN41181721	2022-04-18	Mozambique	Niassa	dried blood spot
911	1961157	PRJNA1107381	SAMN41181720	2022-03-28	Mozambique	Niassa	dried blood spot
912	1.96153e+06	PRJNA1107381	SAMN41181324	2022-03-21	Mozambique	Manica	dried blood spot
913	1933619	PRJNA1107381	SAMN41181969	2022-02-20	Mozambique	Zambezia	dried blood spot
914	1.9612e+06	PRJNA1107381	SAMN41181723	2022-03-29	Mozambique	Niassa	dried blood spot
915	1.96153e+06	PRJNA1107381	SAMN41181325	2022-03-21	Mozambique	Manica	dried blood spot
916	1.96193e+06	PRJNA1107381	SAMN41181330	2022-04-01	Mozambique	Manica	dried blood spot
917	1.9617e+06	PRJNA1107381	SAMN41181328	2022-04-25	Mozambique	Manica	dried blood spot
918	1.96224e+06	PRJNA1107381	SAMN41181333	2022-03-24	Mozambique	Manica	dried blood spot
919	1.96248e+06	PRJNA1107381	SAMN41181336	2022-03-31	Mozambique	Manica	dried blood spot
920	1.97852e+06	PRJNA1107381	SAMN41181548	2022-05-05	Mozambique	Maputo	dried blood spot
921	1.9283e+06	PRJNA1107381	SAMN41181234	2022-03-25	Mozambique	Inhambane	dried blood spot
922	1962006	PRJNA1107381	SAMN41181332	2022-03-17	Mozambique	Manica	dried blood spot
923	1.96263e+06	PRJNA1107381	SAMN41181339	2022-03-16	Mozambique	Manica	dried blood spot
924	1.96248e+06	PRJNA1107381	SAMN41181337	2022-04-04	Mozambique	Manica	dried blood spot
925	1.96259e+06	PRJNA1107381	SAMN41181338	2022-04-25	Mozambique	Manica	dried blood spot
926	1.9627e+06	PRJNA1107381	SAMN41181341	2022-02-05	Mozambique	Manica	dried blood spot
927	1.9632e+06	PRJNA1107381	SAMN41181347	2022-03-21	Mozambique	Manica	dried blood spot
928	1933734	PRJNA1107381	SAMN41181982	2022-02-01	Mozambique	Zambezia	dried blood spot
929	1.96315e+06	PRJNA1107381	SAMN41181346	2022-03-16	Mozambique	Manica	dried blood spot
930	1.96332e+06	PRJNA1107381	SAMN41181348	2022-03-25	Mozambique	Manica	dried blood spot
931	1.96339e+06	PRJNA1107381	SAMN41181350	2022-03-21	Mozambique	Manica	dried blood spot
932	1963744	PRJNA1107381	SAMN41181358	2022-03-28	Mozambique	Manica	dried blood spot
933	1.96354e+06	PRJNA1107381	SAMN41181352	2022-04-14	Mozambique	Manica	dried blood spot
934	1.96357e+06	PRJNA1107381	SAMN41181353	2022-03-07	Mozambique	Manica	dried blood spot
935	1.96358e+06	PRJNA1107381	SAMN41181354	2022-03-07	Mozambique	Manica	dried blood spot
936	1.93374e+06	PRJNA1107381	SAMN41181984	2022-02-02	Mozambique	Zambezia	dried blood spot
937	1.9636e+06	PRJNA1107381	SAMN41181355	2022-03-25	Mozambique	Manica	dried blood spot
938	1.96374e+06	PRJNA1107381	SAMN41181357	2022-04-11	Mozambique	Manica	dried blood spot
939	1.96375e+06	PRJNA1107381	SAMN41181359	2022-03-10	Mozambique	Manica	dried blood spot
940	1.99161e+06	PRJNA1107381	SAMN41181552	2022-04-18	Mozambique	Maputo	dried blood spot
941	1.96395e+06	PRJNA1107381	SAMN41181361	2022-03-10	Mozambique	Manica	dried blood spot
942	1.93367e+06	PRJNA1107381	SAMN41181978	2022-04-03	Mozambique	Zambezia	dried blood spot
943	1.96376e+06	PRJNA1107381	SAMN41181360	2022-04-08	Mozambique	Manica	dried blood spot
944	1.99105e+06	PRJNA1107381	SAMN41181551	2022-05-11	Mozambique	Maputo	dried blood spot
945	1.93366e+06	PRJNA1107381	SAMN41181976	2022-02-04	Mozambique	Zambezia	dried blood spot
946	1.99164e+06	PRJNA1107381	SAMN41181553	2022-05-12	Mozambique	Maputo	dried blood spot
947	1.97914e+06	PRJNA1107381	SAMN41181550	2022-04-13	Mozambique	Maputo	dried blood spot
948	1991691	PRJNA1107381	SAMN41181555	2022-05-04	Mozambique	Maputo	dried blood spot
949	1.93362e+06	PRJNA1107381	SAMN41181971	2022-02-04	Mozambique	Zambezia	dried blood spot
950	1.93375e+06	PRJNA1107381	SAMN41181985	2022-02-02	Mozambique	Zambezia	dried blood spot
951	1.93372e+06	PRJNA1107381	SAMN41181980	2022-02-01	Mozambique	Zambezia	dried blood spot
952	1.93362e+06	PRJNA1107381	SAMN41181968	2022-01-20	Mozambique	Zambezia	dried blood spot
953	1.93363e+06	PRJNA1107381	SAMN41181972	2022-02-16	Mozambique	Zambezia	dried blood spot
954	1933974	PRJNA1107381	SAMN41181986	2022-02-09	Mozambique	Zambezia	dried blood spot
955	1.93365e+06	PRJNA1107381	SAMN41181975	2022-01-18	Mozambique	Zambezia	dried blood spot
956	1.93374e+06	PRJNA1107381	SAMN41181983	2022-02-04	Mozambique	Zambezia	dried blood spot
957	1933594	PRJNA1107381	SAMN41181964	2022-01-25	Mozambique	Zambezia	dried blood spot
958	1.93362e+06	PRJNA1107381	SAMN41181970	2022-02-17	Mozambique	Zambezia	dried blood spot
959	1.93402e+06	PRJNA1107381	SAMN41181990	2022-02-01	Mozambique	Zambezia	dried blood spot
960	1.9334e+06	PRJNA1107381	SAMN41181958	2022-02-01	Mozambique	Zambezia	dried blood spot
961	1.934e+06	PRJNA1107381	SAMN41181988	2022-01-28	Mozambique	Zambezia	dried blood spot
962	1.93531e+06	PRJNA1107381	SAMN41181260	2022-03-24	Mozambique	Inhambane	dried blood spot
963	1.93555e+06	PRJNA1107381	SAMN41181265	2022-03-23	Mozambique	Inhambane	dried blood spot
964	1.9346e+06	PRJNA1107381	SAMN41181235	2022-03-23	Mozambique	Inhambane	dried blood spot
965	1934779	PRJNA1107381	SAMN41181237	2022-03-21	Mozambique	Inhambane	dried blood spot
966	1.9341e+06	PRJNA1107381	SAMN41181992	2022-01-31	Mozambique	Zambezia	dried blood spot
967	1.93475e+06	PRJNA1107381	SAMN41181236	2022-03-24	Mozambique	Inhambane	dried blood spot
968	1934076	PRJNA1107381	SAMN41181991	2022-02-11	Mozambique	Zambezia	dried blood spot
969	1934159	PRJNA1107381	SAMN41181994	2022-02-04	Mozambique	Zambezia	dried blood spot
970	1.93357e+06	PRJNA1107381	SAMN41181960	2022-02-04	Mozambique	Zambezia	dried blood spot
971	1.9348e+06	PRJNA1107381	SAMN41181238	2022-03-21	Mozambique	Inhambane	dried blood spot
972	1.93484e+06	PRJNA1107381	SAMN41181240	2022-05-07	Mozambique	Inhambane	dried blood spot
973	1.93483e+06	PRJNA1107381	SAMN41181239	2022-03-16	Mozambique	Inhambane	dried blood spot
974	1.93486e+06	PRJNA1107381	SAMN41181241	2022-03-25	Mozambique	Inhambane	dried blood spot
975	1934865	PRJNA1107381	SAMN41181243	2022-04-25	Mozambique	Inhambane	dried blood spot
976	1.93486e+06	PRJNA1107381	SAMN41181242	2022-04-29	Mozambique	Inhambane	dried blood spot
977	1.93499e+06	PRJNA1107381	SAMN41181245	2022-04-08	Mozambique	Inhambane	dried blood spot
978	1.93489e+06	PRJNA1107381	SAMN41181244	2022-03-21	Mozambique	Inhambane	dried blood spot
979	1.935e+06	PRJNA1107381	SAMN41181247	2022-03-21	Mozambique	Inhambane	dried blood spot
980	1.93499e+06	PRJNA1107381	SAMN41181246	2022-03-25	Mozambique	Inhambane	dried blood spot
981	1.93504e+06	PRJNA1107381	SAMN41181250	2022-04-12	Mozambique	Inhambane	dried blood spot
982	1.93501e+06	PRJNA1107381	SAMN41181248	2022-04-06	Mozambique	Inhambane	dried blood spot
983	1.93516e+06	PRJNA1107381	SAMN41181252	2022-03-24	Mozambique	Inhambane	dried blood spot
984	1.93513e+06	PRJNA1107381	SAMN41181251	2022-04-19	Mozambique	Inhambane	dried blood spot
985	1.93503e+06	PRJNA1107381	SAMN41181249	2022-03-22	Mozambique	Inhambane	dried blood spot
986	1.93517e+06	PRJNA1107381	SAMN41181253	2022-03-17	Mozambique	Inhambane	dried blood spot
987	1.93523e+06	PRJNA1107381	SAMN41181255	2022-05-27	Mozambique	Inhambane	dried blood spot
988	1.93519e+06	PRJNA1107381	SAMN41181254	2022-03-27	Mozambique	Inhambane	dried blood spot
989	1.93526e+06	PRJNA1107381	SAMN41181256	2022-03-25	Mozambique	Inhambane	dried blood spot
990	1.93684e+06	PRJNA1107381	SAMN41181778	2022-03-31	Mozambique	Sofala	dried blood spot
991	1.93357e+06	PRJNA1107381	SAMN41181961	2022-01-21	Mozambique	Zambezia	dried blood spot
992	1.93708e+06	PRJNA1107381	SAMN41181786	2022-05-30	Mozambique	Sofala	dried blood spot
993	1935305	PRJNA1107381	SAMN41181259	2022-04-01	Mozambique	Inhambane	dried blood spot
994	1.9354e+06	PRJNA1107381	SAMN41181262	2022-04-05	Mozambique	Inhambane	dried blood spot
995	1.93535e+06	PRJNA1107381	SAMN41181261	2022-03-25	Mozambique	Inhambane	dried blood spot
996	1.93528e+06	PRJNA1107381	SAMN41181258	2022-03-16	Mozambique	Inhambane	dried blood spot
997	1.93566e+06	PRJNA1107381	SAMN41181266	2022-03-30	Mozambique	Inhambane	dried blood spot
998	1.93567e+06	PRJNA1107381	SAMN41181268	2022-03-23	Mozambique	Inhambane	dried blood spot
999	1.93874e+06	PRJNA1107381	SAMN41181278	2022-03-28	Mozambique	Inhambane	dried blood spot
1000	1.93566e+06	PRJNA1107381	SAMN41181267	2022-05-30	Mozambique	Inhambane	dried blood spot
1001	1.93339e+06	PRJNA1107381	SAMN41181955	2022-02-02	Mozambique	Zambezia	dried blood spot
1002	1935459	PRJNA1107381	SAMN41181264	2022-04-11	Mozambique	Inhambane	dried blood spot
1003	1.93584e+06	PRJNA1107381	SAMN41181270	2022-03-17	Mozambique	Inhambane	dried blood spot
1004	1.93541e+06	PRJNA1107381	SAMN41181263	2022-03-31	Mozambique	Inhambane	dried blood spot
1005	1.93567e+06	PRJNA1107381	SAMN41181269	2022-03-16	Mozambique	Inhambane	dried blood spot
1006	1.93605e+06	PRJNA1107381	SAMN41181273	2022-05-17	Mozambique	Inhambane	dried blood spot
1007	1.93879e+06	PRJNA1107381	SAMN41181283	2022-03-24	Mozambique	Inhambane	dried blood spot
1008	1.93617e+06	PRJNA1107381	SAMN41181771	2022-03-23	Mozambique	Sofala	dried blood spot
1009	1.93615e+06	PRJNA1107381	SAMN41181770	2022-03-31	Mozambique	Sofala	dried blood spot
1010	1.93618e+06	PRJNA1107381	SAMN41181772	2022-03-30	Mozambique	Sofala	dried blood spot
1011	1.93358e+06	PRJNA1107381	SAMN41181962	2022-01-27	Mozambique	Zambezia	dried blood spot
1012	1.93618e+06	PRJNA1107381	SAMN41181773	2022-03-23	Mozambique	Sofala	dried blood spot
1013	1939323	PRJNA1107381	SAMN41181525	2022-04-25	Mozambique	Maputo	dried blood spot
1014	1.93631e+06	PRJNA1107381	SAMN41181774	2022-03-30	Mozambique	Sofala	dried blood spot
1015	1.93684e+06	PRJNA1107381	SAMN41181777	2022-03-22	Mozambique	Sofala	dried blood spot
1016	1.93684e+06	PRJNA1107381	SAMN41181779	2022-04-12	Mozambique	Sofala	dried blood spot
1017	1.93631e+06	PRJNA1107381	SAMN41181776	2022-03-24	Mozambique	Sofala	dried blood spot
1018	1.93684e+06	PRJNA1107381	SAMN41181780	2022-04-12	Mozambique	Sofala	dried blood spot
1019	1.93704e+06	PRJNA1107381	SAMN41181783	2022-03-28	Mozambique	Sofala	dried blood spot
1020	1936874	PRJNA1107381	SAMN41181781	2022-05-05	Mozambique	Sofala	dried blood spot
1021	1.93943e+06	PRJNA1107381	SAMN41181534	2022-04-12	Mozambique	Maputo	dried blood spot
1022	1.92826e+06	PRJNA1107381	SAMN41181286	2022-04-12	Mozambique	Inhambane	dried blood spot
1023	1.93416e+06	PRJNA1107381	SAMN41182039	2022-02-04	Mozambique	Zambezia	dried blood spot
1024	1.94043e+06	PRJNA1107381	SAMN41181570	2022-03-08	Mozambique	Maputo	dried blood spot
1025	1.94189e+06	PRJNA1107381	SAMN41181832	2022-03-28	Mozambique	Sofala	dried blood spot
1026	1.94201e+06	PRJNA1107381	SAMN41181838	2022-03-31	Mozambique	Sofala	dried blood spot
1027	1.95957e+06	PRJNA1107381	SAMN41181728	2022-04-14	Mozambique	Niassa	dried blood spot
1028	1.96118e+06	PRJNA1107381	SAMN41181740	2022-04-14	Mozambique	Niassa	dried blood spot
1029	1.96121e+06	PRJNA1107381	SAMN41181742	2022-04-05	Mozambique	Niassa	dried blood spot
1030	1933635	PRJNA1107381	SAMN41182012	2022-02-03	Mozambique	Zambezia	dried blood spot
1031	1.96116e+06	PRJNA1107381	SAMN41181739	2022-03-26	Mozambique	Niassa	dried blood spot
1032	1.95958e+06	PRJNA1107381	SAMN41181730	2022-04-14	Mozambique	Niassa	dried blood spot
1033	1.96113e+06	PRJNA1107381	SAMN41181736	2022-03-22	Mozambique	Niassa	dried blood spot
1034	1.95957e+06	PRJNA1107381	SAMN41181729	2022-04-05	Mozambique	Niassa	dried blood spot
1035	1.9597e+06	PRJNA1107381	SAMN41181731	2022-03-18	Mozambique	Niassa	dried blood spot
1036	1.96115e+06	PRJNA1107381	SAMN41181737	2022-04-21	Mozambique	Niassa	dried blood spot
1037	1.96108e+06	PRJNA1107381	SAMN41181735	2022-04-06	Mozambique	Niassa	dried blood spot
1038	1.96115e+06	PRJNA1107381	SAMN41181738	2022-04-21	Mozambique	Niassa	dried blood spot
1039	1.95956e+06	PRJNA1107381	SAMN41181727	2022-04-21	Mozambique	Niassa	dried blood spot
1040	1.95979e+06	PRJNA1107381	SAMN41181732	2022-04-21	Mozambique	Niassa	dried blood spot
1041	1.93346e+06	PRJNA1107381	SAMN41182001	2022-01-24	Mozambique	Zambezia	dried blood spot
1042	1.9612e+06	PRJNA1107381	SAMN41181741	2022-04-11	Mozambique	Niassa	dried blood spot
1043	1.96074e+06	PRJNA1107381	SAMN41181733	2022-03-22	Mozambique	Niassa	dried blood spot
1044	1.96228e+06	PRJNA1107381	SAMN41181370	2022-03-30	Mozambique	Manica	dried blood spot
1045	1961780	PRJNA1107381	SAMN41181368	2022-03-29	Mozambique	Manica	dried blood spot
1046	1.96104e+06	PRJNA1107381	SAMN41181734	2022-04-05	Mozambique	Niassa	dried blood spot
1047	1.93356e+06	PRJNA1107381	SAMN41182004	2022-02-04	Mozambique	Zambezia	dried blood spot
1048	1961313	PRJNA1107381	SAMN41181367	2022-04-11	Mozambique	Manica	dried blood spot
1049	1.96183e+06	PRJNA1107381	SAMN41181369	2022-03-17	Mozambique	Manica	dried blood spot
1050	1.9424e+06	PRJNA1107381	SAMN41181845	2022-03-21	Mozambique	Sofala	dried blood spot
1051	1.93341e+06	PRJNA1107381	SAMN41181997	2022-01-21	Mozambique	Zambezia	dried blood spot
1052	1.93358e+06	PRJNA1107381	SAMN41182008	2022-02-04	Mozambique	Zambezia	dried blood spot
1053	1963476	PRJNA1107381	SAMN41181375	2022-03-29	Mozambique	Manica	dried blood spot
1054	1.96247e+06	PRJNA1107381	SAMN41181371	2022-03-22	Mozambique	Manica	dried blood spot
1055	1.93496e+06	PRJNA1107381	SAMN41181291	2022-04-18	Mozambique	Inhambane	dried blood spot
1056	1.96248e+06	PRJNA1107381	SAMN41181372	2022-03-23	Mozambique	Manica	dried blood spot
1057	1963124	PRJNA1107381	SAMN41181373	2022-03-17	Mozambique	Manica	dried blood spot
1058	1.96321e+06	PRJNA1107381	SAMN41181374	2022-03-22	Mozambique	Manica	dried blood spot
1059	1.9351e+06	PRJNA1107381	SAMN41181292	2022-03-29	Mozambique	Inhambane	dried blood spot
1060	1.96353e+06	PRJNA1107381	SAMN41181377	2022-03-30	Mozambique	Manica	dried blood spot
1061	1.9283e+06	PRJNA1107381	SAMN41181287	2022-04-18	Mozambique	Inhambane	dried blood spot
1062	1.9635e+06	PRJNA1107381	SAMN41181376	2022-03-29	Mozambique	Manica	dried blood spot
1063	1.96365e+06	PRJNA1107381	SAMN41181380	2022-03-29	Mozambique	Manica	dried blood spot
1064	1.9636e+06	PRJNA1107381	SAMN41181379	2022-03-17	Mozambique	Manica	dried blood spot
1065	1963661	PRJNA1107381	SAMN41181381	2022-03-10	Mozambique	Manica	dried blood spot
1066	1.96373e+06	PRJNA1107381	SAMN41181382	2022-04-11	Mozambique	Manica	dried blood spot
1067	1.96374e+06	PRJNA1107381	SAMN41181383	2022-04-11	Mozambique	Manica	dried blood spot
1068	1.96374e+06	PRJNA1107381	SAMN41181384	2022-03-23	Mozambique	Manica	dried blood spot
1069	1.9341e+06	PRJNA1107381	SAMN41182031	2022-02-10	Mozambique	Zambezia	dried blood spot
1070	1.93373e+06	PRJNA1107381	SAMN41182020	2022-02-02	Mozambique	Zambezia	dried blood spot
1071	1.96375e+06	PRJNA1107381	SAMN41181385	2022-03-26	Mozambique	Manica	dried blood spot
1072	1.96376e+06	PRJNA1107381	SAMN41181387	2022-03-08	Mozambique	Manica	dried blood spot
1073	1.96375e+06	PRJNA1107381	SAMN41181386	2022-03-10	Mozambique	Manica	dried blood spot
1074	1.96385e+06	PRJNA1107381	SAMN41181388	2022-03-24	Mozambique	Manica	dried blood spot
1075	1.93346e+06	PRJNA1107381	SAMN41182002	2022-01-24	Mozambique	Zambezia	dried blood spot
1076	1.98181e+06	PRJNA1107381	SAMN41181584	2022-04-04	Mozambique	Maputo	dried blood spot
1077	1.9911e+06	PRJNA1107381	SAMN41181589	2022-04-19	Mozambique	Maputo	dried blood spot
1078	1.99119e+06	PRJNA1107381	SAMN41181590	2022-05-06	Mozambique	Maputo	dried blood spot
1079	1.99136e+06	PRJNA1107381	SAMN41181593	2022-04-19	Mozambique	Maputo	dried blood spot
1080	1.99119e+06	PRJNA1107381	SAMN41181591	2022-05-06	Mozambique	Maputo	dried blood spot
1081	1.99119e+06	PRJNA1107381	SAMN41181592	2022-05-05	Mozambique	Maputo	dried blood spot
1082	1991394	PRJNA1107381	SAMN41181594	2022-04-19	Mozambique	Maputo	dried blood spot
1083	1.9915e+06	PRJNA1107381	SAMN41181596	2022-05-05	Mozambique	Maputo	dried blood spot
1084	1.99142e+06	PRJNA1107381	SAMN41181595	2022-04-20	Mozambique	Maputo	dried blood spot
1085	1.99154e+06	PRJNA1107381	SAMN41181597	2022-05-03	Mozambique	Maputo	dried blood spot
1086	1.99154e+06	PRJNA1107381	SAMN41181598	2022-04-20	Mozambique	Maputo	dried blood spot
1087	1.9349e+06	PRJNA1107381	SAMN41181289	2022-03-28	Mozambique	Inhambane	dried blood spot
1088	1.99156e+06	PRJNA1107381	SAMN41181599	2022-04-26	Mozambique	Maputo	dried blood spot
1089	1.99161e+06	PRJNA1107381	SAMN41181602	2022-04-28	Mozambique	Maputo	dried blood spot
1090	1933718	PRJNA1107381	SAMN41182018	2022-02-01	Mozambique	Zambezia	dried blood spot
1091	1.93396e+06	PRJNA1107381	SAMN41182024	2022-02-10	Mozambique	Zambezia	dried blood spot
1092	1.93367e+06	PRJNA1107381	SAMN41182016	2022-01-19	Mozambique	Zambezia	dried blood spot
1093	1941894	PRJNA1107381	SAMN41181833	2022-03-30	Mozambique	Sofala	dried blood spot
1094	1.94225e+06	PRJNA1107381	SAMN41181843	2022-03-21	Mozambique	Sofala	dried blood spot
1095	1.94216e+06	PRJNA1107381	SAMN41181839	2022-04-12	Mozambique	Sofala	dried blood spot
1096	1.94189e+06	PRJNA1107381	SAMN41181830	2022-03-18	Mozambique	Sofala	dried blood spot
1097	1.93495e+06	PRJNA1107381	SAMN41181290	2022-03-21	Mozambique	Inhambane	dried blood spot
1098	1.9419e+06	PRJNA1107381	SAMN41181834	2022-03-29	Mozambique	Sofala	dried blood spot
1099	1.94191e+06	PRJNA1107381	SAMN41181836	2022-03-22	Mozambique	Sofala	dried blood spot
1100	1.94225e+06	PRJNA1107381	SAMN41181841	2022-03-21	Mozambique	Sofala	dried blood spot
1101	1.9419e+06	PRJNA1107381	SAMN41181835	2022-03-29	Mozambique	Sofala	dried blood spot
1102	1.9424e+06	PRJNA1107381	SAMN41181844	2022-04-12	Mozambique	Sofala	dried blood spot
1103	1.94259e+06	PRJNA1107381	SAMN41181846	2022-03-26	Mozambique	Sofala	dried blood spot
1104	1942699	PRJNA1107381	SAMN41181847	2022-04-12	Mozambique	Sofala	dried blood spot
1105	1.94225e+06	PRJNA1107381	SAMN41181842	2022-03-21	Mozambique	Sofala	dried blood spot
1106	1.95938e+06	PRJNA1107381	SAMN41181725	2022-03-25	Mozambique	Niassa	dried blood spot
1107	1.95925e+06	PRJNA1107381	SAMN41181724	2022-03-22	Mozambique	Niassa	dried blood spot
1108	1934050	PRJNA1107381	SAMN41182026	2022-01-21	Mozambique	Zambezia	dried blood spot
1109	1.95949e+06	PRJNA1107381	SAMN41181726	2022-03-25	Mozambique	Niassa	dried blood spot
1110	1.93346e+06	PRJNA1107381	SAMN41182000	2022-01-24	Mozambique	Zambezia	dried blood spot
1111	1.93411e+06	PRJNA1107381	SAMN41182033	2022-02-10	Mozambique	Zambezia	dried blood spot
1112	1.9341e+06	PRJNA1107381	SAMN41182032	2022-02-10	Mozambique	Zambezia	dried blood spot
1113	1.93372e+06	PRJNA1107381	SAMN41182019	2022-02-01	Mozambique	Zambezia	dried blood spot
1114	1.93412e+06	PRJNA1107381	SAMN41182035	2022-02-10	Mozambique	Zambezia	dried blood spot
1115	1.93577e+06	PRJNA1107381	SAMN41181311	2022-03-27	Mozambique	Inhambane	dried blood spot
1116	1.93549e+06	PRJNA1107381	SAMN41181307	2022-04-21	Mozambique	Inhambane	dried blood spot
1117	1935350	PRJNA1107381	SAMN41181302	2022-05-27	Mozambique	Inhambane	dried blood spot
1118	1.93552e+06	PRJNA1107381	SAMN41181308	2022-03-29	Mozambique	Inhambane	dried blood spot
1119	1.93529e+06	PRJNA1107381	SAMN41181301	2022-03-29	Mozambique	Inhambane	dried blood spot
1120	1.93537e+06	PRJNA1107381	SAMN41181303	2022-03-21	Mozambique	Inhambane	dried blood spot
1121	1.93374e+06	PRJNA1107381	SAMN41182022	2022-02-02	Mozambique	Zambezia	dried blood spot
1122	1.93512e+06	PRJNA1107381	SAMN41181294	2022-03-31	Mozambique	Inhambane	dried blood spot
1123	1.93529e+06	PRJNA1107381	SAMN41181300	2022-04-04	Mozambique	Inhambane	dried blood spot
1124	1.93523e+06	PRJNA1107381	SAMN41181297	2022-05-27	Mozambique	Inhambane	dried blood spot
1125	1.93526e+06	PRJNA1107381	SAMN41181299	2022-06-07	Mozambique	Inhambane	dried blood spot
1126	1.93548e+06	PRJNA1107381	SAMN41181306	2022-04-11	Mozambique	Inhambane	dried blood spot
1127	1.93581e+06	PRJNA1107381	SAMN41181313	2022-04-20	Mozambique	Inhambane	dried blood spot
1128	1.93869e+06	PRJNA1107381	SAMN41181322	2022-03-28	Mozambique	Inhambane	dried blood spot
1129	1.93581e+06	PRJNA1107381	SAMN41181312	2022-03-22	Mozambique	Inhambane	dried blood spot
1130	1.9356e+06	PRJNA1107381	SAMN41181310	2022-03-30	Mozambique	Inhambane	dried blood spot
1131	1.93604e+06	PRJNA1107381	SAMN41181315	2022-04-04	Mozambique	Inhambane	dried blood spot
1132	1.93466e+06	PRJNA1107381	SAMN41181288	2022-03-21	Mozambique	Inhambane	dried blood spot
1133	1.93616e+06	PRJNA1107381	SAMN41181809	2022-03-29	Mozambique	Sofala	dried blood spot
1134	1.93586e+06	PRJNA1107381	SAMN41181314	2022-04-21	Mozambique	Inhambane	dried blood spot
1135	1.93605e+06	PRJNA1107381	SAMN41181316	2022-04-22	Mozambique	Inhambane	dried blood spot
1136	1.93605e+06	PRJNA1107381	SAMN41181319	2022-04-22	Mozambique	Inhambane	dried blood spot
1137	1.9363e+06	PRJNA1107381	SAMN41181810	2022-05-18	Mozambique	Sofala	dried blood spot
1138	1.9369e+06	PRJNA1107381	SAMN41181822	2022-03-18	Mozambique	Sofala	dried blood spot
1139	1.9363e+06	PRJNA1107381	SAMN41181812	2022-05-17	Mozambique	Sofala	dried blood spot
1140	1.93654e+06	PRJNA1107381	SAMN41181815	2022-04-13	Mozambique	Sofala	dried blood spot
1141	1.93605e+06	PRJNA1107381	SAMN41181318	2022-04-22	Mozambique	Inhambane	dried blood spot
1142	1.93649e+06	PRJNA1107381	SAMN41181813	2022-04-13	Mozambique	Sofala	dried blood spot
1143	1.93366e+06	PRJNA1107381	SAMN41182014	2022-02-04	Mozambique	Zambezia	dried blood spot
1144	1.93684e+06	PRJNA1107381	SAMN41181817	2022-03-31	Mozambique	Sofala	dried blood spot
1145	1.93654e+06	PRJNA1107381	SAMN41181814	2022-03-30	Mozambique	Sofala	dried blood spot
1146	1.93616e+06	PRJNA1107381	SAMN41181808	2022-04-05	Mozambique	Sofala	dried blood spot
1147	1.93684e+06	PRJNA1107381	SAMN41181818	2022-04-01	Mozambique	Sofala	dried blood spot
1148	1.93709e+06	PRJNA1107381	SAMN41181824	2022-03-29	Mozambique	Sofala	dried blood spot
1149	1.93658e+06	PRJNA1107381	SAMN41181816	2022-03-22	Mozambique	Sofala	dried blood spot
1150	1.93685e+06	PRJNA1107381	SAMN41181819	2022-04-12	Mozambique	Sofala	dried blood spot
1151	1.93697e+06	PRJNA1107381	SAMN41181823	2022-03-24	Mozambique	Sofala	dried blood spot
1152	1.93685e+06	PRJNA1107381	SAMN41181821	2022-03-31	Mozambique	Sofala	dried blood spot
1153	1.93416e+06	PRJNA1107381	SAMN41182038	2022-02-07	Mozambique	Zambezia	dried blood spot
1154	1.93685e+06	PRJNA1107381	SAMN41181820	2022-03-31	Mozambique	Sofala	dried blood spot
1155	1.93882e+06	PRJNA1107381	SAMN41181323	2022-03-30	Mozambique	Inhambane	dried blood spot
1156	1.93934e+06	PRJNA1107381	SAMN41181557	2022-04-22	Mozambique	Maputo	dried blood spot
1157	1.93929e+06	PRJNA1107381	SAMN41181556	2022-03-17	Mozambique	Maputo	dried blood spot
1158	1.93947e+06	PRJNA1107381	SAMN41181518	2022-04-19	Mozambique	Maputo	dried blood spot
1159	1.93935e+06	PRJNA1107381	SAMN41181558	2022-04-28	Mozambique	Maputo	dried blood spot
1160	1.94193e+06	PRJNA1107381	SAMN41181837	2022-03-27	Mozambique	Sofala	dried blood spot
1161	1.93953e+06	PRJNA1107381	SAMN41181562	2022-03-24	Mozambique	Maputo	dried blood spot
1162	1.93961e+06	PRJNA1107381	SAMN41181540	2022-04-13	Mozambique	Maputo	dried blood spot
1163	1.93366e+06	PRJNA1107381	SAMN41182013	2022-02-04	Mozambique	Zambezia	dried blood spot
1164	1939381	PRJNA1107381	SAMN41181560	2022-04-27	Mozambique	Maputo	dried blood spot
1165	1.93936e+06	PRJNA1107381	SAMN41181559	2022-02-25	Mozambique	Maputo	dried blood spot
1166	1.93947e+06	PRJNA1107381	SAMN41181561	2022-04-19	Mozambique	Maputo	dried blood spot
1167	1.93959e+06	PRJNA1107381	SAMN41181563	2022-03-22	Mozambique	Maputo	dried blood spot
1168	1.93963e+06	PRJNA1107381	SAMN41181566	2022-04-22	Mozambique	Maputo	dried blood spot
1169	1.93963e+06	PRJNA1107381	SAMN41181565	2022-03-31	Mozambique	Maputo	dried blood spot
1170	1.93967e+06	PRJNA1107381	SAMN41181567	2022-04-27	Mozambique	Maputo	dried blood spot
1171	1.93961e+06	PRJNA1107381	SAMN41181564	2022-03-15	Mozambique	Maputo	dried blood spot
1172	1.93374e+06	PRJNA1107381	SAMN41182021	2022-02-02	Mozambique	Zambezia	dried blood spot
1173	1.93339e+06	PRJNA1107381	SAMN41181995	2022-02-04	Mozambique	Zambezia	dried blood spot
1174	1.9363e+06	PRJNA1107381	SAMN41181811	2022-05-18	Mozambique	Sofala	dried blood spot
1175	1.93512e+06	PRJNA1107381	SAMN41181293	2022-03-31	Mozambique	Inhambane	dried blood spot
1176	1.94033e+06	PRJNA1107381	SAMN41181568	2022-03-21	Mozambique	Maputo	dried blood spot
1177	1.93555e+06	PRJNA1107381	SAMN41181309	2022-03-23	Mozambique	Inhambane	dried blood spot
1178	1.94038e+06	PRJNA1107381	SAMN41181569	2022-03-25	Mozambique	Maputo	dried blood spot
1179	1.94193e+06	PRJNA1107381	SAMN41181851	2022-03-26	Mozambique	Sofala	dried blood spot
1180	1.96115e+06	PRJNA1107381	SAMN41181762	2022-04-01	Mozambique	Niassa	dried blood spot
1181	1.9597e+06	PRJNA1107381	SAMN41181753	2022-03-17	Mozambique	Niassa	dried blood spot
1182	1.95924e+06	PRJNA1107381	SAMN41181747	2022-03-25	Mozambique	Niassa	dried blood spot
1183	1.95882e+06	PRJNA1107381	SAMN41181746	2022-04-01	Mozambique	Niassa	dried blood spot
1184	1.95956e+06	PRJNA1107381	SAMN41181751	2022-04-07	Mozambique	Niassa	dried blood spot
1185	1.96112e+06	PRJNA1107381	SAMN41181759	2022-04-01	Mozambique	Niassa	dried blood spot
1186	1.96153e+06	PRJNA1107381	SAMN41181391	2022-03-09	Mozambique	Manica	dried blood spot
1187	1933565	PRJNA1107381	SAMN41182005	2022-02-04	Mozambique	Zambezia	dried blood spot
1188	1.96119e+06	PRJNA1107381	SAMN41181768	2022-03-29	Mozambique	Niassa	dried blood spot
1189	1.96133e+06	PRJNA1107381	SAMN41181390	2022-03-30	Mozambique	Manica	dried blood spot
1190	1.96359e+06	PRJNA1107381	SAMN41181399	2022-03-09	Mozambique	Manica	dried blood spot
1191	1.96279e+06	PRJNA1107381	SAMN41181393	2022-04-01	Mozambique	Manica	dried blood spot
1192	1.96192e+06	PRJNA1107381	SAMN41181392	2022-03-09	Mozambique	Manica	dried blood spot
1193	1.96359e+06	PRJNA1107381	SAMN41181398	2022-03-07	Mozambique	Manica	dried blood spot
1194	1.96359e+06	PRJNA1107381	SAMN41181397	2022-03-07	Mozambique	Manica	dried blood spot
1195	1.97851e+06	PRJNA1107381	SAMN41181604	2022-04-28	Mozambique	Maputo	dried blood spot
1196	1.96375e+06	PRJNA1107381	SAMN41181401	2022-03-23	Mozambique	Manica	dried blood spot
1197	1964156	PRJNA1107381	SAMN41181403	2022-03-08	Mozambique	Manica	dried blood spot
1198	1.96376e+06	PRJNA1107381	SAMN41181402	2022-03-08	Mozambique	Manica	dried blood spot
1199	1.93406e+06	PRJNA1107381	SAMN41182028	2022-02-14	Mozambique	Zambezia	dried blood spot
1200	1.99153e+06	PRJNA1107381	SAMN41181607	2022-04-27	Mozambique	Maputo	dried blood spot
1201	1.93346e+06	PRJNA1107381	SAMN41181999	2022-01-24	Mozambique	Zambezia	dried blood spot
1202	1.93405e+06	PRJNA1107381	SAMN41182027	2022-01-27	Mozambique	Zambezia	dried blood spot
1203	1.93342e+06	PRJNA1107381	SAMN41181998	2022-01-21	Mozambique	Zambezia	dried blood spot
1204	1.93368e+06	PRJNA1107381	SAMN41182017	2022-01-17	Mozambique	Zambezia	dried blood spot
1205	1934034	PRJNA1107381	SAMN41182025	2022-01-27	Mozambique	Zambezia	dried blood spot
1206	1.93366e+06	PRJNA1107381	SAMN41182015	2022-01-22	Mozambique	Zambezia	dried blood spot
1207	1.93944e+06	PRJNA1107381	SAMN41181577	2022-03-29	Mozambique	Maputo	dried blood spot
1208	1.9336e+06	PRJNA1107381	SAMN41182009	2022-01-25	Mozambique	Zambezia	dried blood spot
1209	1.93406e+06	PRJNA1107381	SAMN41182029	2022-01-21	Mozambique	Zambezia	dried blood spot
1210	1.93517e+06	PRJNA1107381	SAMN41181296	2022-05-27	Mozambique	Inhambane	dried blood spot
1211	1934117	PRJNA1107381	SAMN41182037	2022-02-10	Mozambique	Zambezia	dried blood spot
1212	1.93514e+06	PRJNA1107381	SAMN41181295	2022-03-31	Mozambique	Inhambane	dried blood spot
1213	1.9354e+06	PRJNA1107381	SAMN41181304	2022-04-11	Mozambique	Inhambane	dried blood spot
1214	1.93569e+06	PRJNA1107381	SAMN41181317	2022-05-25	Mozambique	Inhambane	dried blood spot
1215	1.93411e+06	PRJNA1107381	SAMN41182034	2022-02-10	Mozambique	Zambezia	dried blood spot
1216	1.9341e+06	PRJNA1107381	SAMN41182030	2022-01-31	Mozambique	Zambezia	dried blood spot
1217	1.93524e+06	PRJNA1107381	SAMN41181298	2022-04-21	Mozambique	Inhambane	dried blood spot
1218	1.93598e+06	PRJNA1107381	SAMN41181321	2022-03-29	Mozambique	Inhambane	dried blood spot
1219	1.93686e+06	PRJNA1107381	SAMN41181828	2022-05-04	Mozambique	Sofala	dried blood spot
1220	1.93623e+06	PRJNA1107381	SAMN41181826	2022-04-08	Mozambique	Sofala	dried blood spot
1221	1.93686e+06	PRJNA1107381	SAMN41181829	2022-06-03	Mozambique	Sofala	dried blood spot
1222	1.93685e+06	PRJNA1107381	SAMN41181827	2022-04-19	Mozambique	Sofala	dried blood spot
1223	1.93696e+06	PRJNA1107381	SAMN41181831	2022-05-04	Mozambique	Sofala	dried blood spot
1224	1.9393e+06	PRJNA1107381	SAMN41181572	2022-04-08	Mozambique	Maputo	dried blood spot
1225	1.93953e+06	PRJNA1107381	SAMN41181578	2022-03-30	Mozambique	Maputo	dried blood spot
1226	1.93966e+06	PRJNA1107381	SAMN41181581	2022-04-26	Mozambique	Maputo	dried blood spot
1227	1.93943e+06	PRJNA1107381	SAMN41181576	2022-03-14	Mozambique	Maputo	dried blood spot
1228	1.93963e+06	PRJNA1107381	SAMN41181580	2022-04-25	Mozambique	Maputo	dried blood spot
1229	1.9394e+06	PRJNA1107381	SAMN41181575	2022-03-30	Mozambique	Maputo	dried blood spot
1230	1.94191e+06	PRJNA1107381	SAMN41181850	2022-03-28	Mozambique	Sofala	dried blood spot
1231	1.9419e+06	PRJNA1107381	SAMN41181849	2022-03-18	Mozambique	Sofala	dried blood spot
1232	1.9419e+06	PRJNA1107381	SAMN41181848	2022-03-22	Mozambique	Sofala	dried blood spot
1233	1.93962e+06	PRJNA1107381	SAMN41181579	2022-04-08	Mozambique	Maputo	dried blood spot
1234	1.94226e+06	PRJNA1107381	SAMN41181854	2022-02-21	Mozambique	Sofala	dried blood spot
1235	1.93979e+06	PRJNA1107381	SAMN41181586	2022-04-05	Mozambique	Maputo	dried blood spot
1236	1.95877e+06	PRJNA1107381	SAMN41181743	2022-03-25	Mozambique	Niassa	dried blood spot
1237	1959350	PRJNA1107381	SAMN41181749	2022-03-24	Mozambique	Niassa	dried blood spot
1238	1.94201e+06	PRJNA1107381	SAMN41181852	2022-03-22	Mozambique	Sofala	dried blood spot
1239	1.96113e+06	PRJNA1107381	SAMN41181761	2022-04-01	Mozambique	Niassa	dried blood spot
1240	1.93357e+06	PRJNA1107381	SAMN41182006	2022-01-21	Mozambique	Zambezia	dried blood spot
1241	1.95956e+06	PRJNA1107381	SAMN41181750	2022-04-02	Mozambique	Niassa	dried blood spot
1242	1.96025e+06	PRJNA1107381	SAMN41181754	2022-04-03	Mozambique	Niassa	dried blood spot
1243	1.96076e+06	PRJNA1107381	SAMN41181756	2022-03-22	Mozambique	Niassa	dried blood spot
1244	1.96111e+06	PRJNA1107381	SAMN41181758	2022-04-02	Mozambique	Niassa	dried blood spot
1245	1.9588e+06	PRJNA1107381	SAMN41181744	2022-03-24	Mozambique	Niassa	dried blood spot
1246	1.96118e+06	PRJNA1107381	SAMN41181765	2022-04-02	Mozambique	Niassa	dried blood spot
1247	1.96118e+06	PRJNA1107381	SAMN41181766	2022-03-28	Mozambique	Niassa	dried blood spot
1248	1.96091e+06	PRJNA1107381	SAMN41181757	2022-03-26	Mozambique	Niassa	dried blood spot
1249	1.96118e+06	PRJNA1107381	SAMN41181767	2022-04-02	Mozambique	Niassa	dried blood spot
1250	1.95882e+06	PRJNA1107381	SAMN41181745	2022-03-27	Mozambique	Niassa	dried blood spot
1251	1.96112e+06	PRJNA1107381	SAMN41181760	2022-04-01	Mozambique	Niassa	dried blood spot
1252	1961173	PRJNA1107381	SAMN41181764	2022-03-26	Mozambique	Niassa	dried blood spot
1253	1.95968e+06	PRJNA1107381	SAMN41181752	2022-03-23	Mozambique	Niassa	dried blood spot
1254	1.97128e+06	PRJNA1107381	SAMN41181875	2022-06-09	Mozambique	Tete	dried blood spot
1255	1.97141e+06	PRJNA1107381	SAMN41181877	2022-04-25	Mozambique	Tete	dried blood spot
1256	1.97133e+06	PRJNA1107381	SAMN41181876	2022-04-24	Mozambique	Tete	dried blood spot
1257	1.97144e+06	PRJNA1107381	SAMN41181157	2022-05-27	Mozambique	Cabo Delgado	dried blood spot
1258	1.97145e+06	PRJNA1107381	SAMN41181878	2022-04-01	Mozambique	Tete	dried blood spot
1259	1.97372e+06	PRJNA1107381	SAMN41181175	2022-04-11	Mozambique	Cabo Delgado	dried blood spot
1260	1.97147e+06	PRJNA1107381	SAMN41181879	2022-04-10	Mozambique	Tete	dried blood spot
1261	1.97331e+06	PRJNA1107381	SAMN41181166	2022-03-23	Mozambique	Cabo Delgado	dried blood spot
1262	1.97333e+06	PRJNA1107381	SAMN41181167	2022-03-30	Mozambique	Cabo Delgado	dried blood spot
1263	1.97327e+06	PRJNA1107381	SAMN41181163	2022-05-09	Mozambique	Cabo Delgado	dried blood spot
1264	1.97314e+06	PRJNA1107381	SAMN41181159	2022-05-23	Mozambique	Cabo Delgado	dried blood spot
1265	1.97362e+06	PRJNA1107381	SAMN41181168	2022-05-11	Mozambique	Cabo Delgado	dried blood spot
1266	1.97326e+06	PRJNA1107381	SAMN41181162	2022-05-24	Mozambique	Cabo Delgado	dried blood spot
1267	1.97314e+06	PRJNA1107381	SAMN41181158	2022-05-11	Mozambique	Cabo Delgado	dried blood spot
1268	1.97363e+06	PRJNA1107381	SAMN41181169	2022-04-06	Mozambique	Cabo Delgado	dried blood spot
1269	1.97328e+06	PRJNA1107381	SAMN41181164	2022-05-09	Mozambique	Cabo Delgado	dried blood spot
1270	1.97315e+06	PRJNA1107381	SAMN41181160	2022-05-18	Mozambique	Cabo Delgado	dried blood spot
1271	1.9733e+06	PRJNA1107381	SAMN41181165	2022-03-28	Mozambique	Cabo Delgado	dried blood spot
1272	1.97364e+06	PRJNA1107381	SAMN41181171	2022-04-05	Mozambique	Cabo Delgado	dried blood spot
1273	1973701	PRJNA1107381	SAMN41181173	2022-03-30	Mozambique	Cabo Delgado	dried blood spot
1274	1.97368e+06	PRJNA1107381	SAMN41181172	2022-04-12	Mozambique	Cabo Delgado	dried blood spot
1275	1.97372e+06	PRJNA1107381	SAMN41181174	2022-04-01	Mozambique	Cabo Delgado	dried blood spot
1276	1.97385e+06	PRJNA1107381	SAMN41181184	2022-03-31	Mozambique	Cabo Delgado	dried blood spot
1277	1.97364e+06	PRJNA1107381	SAMN41181170	2022-04-06	Mozambique	Cabo Delgado	dried blood spot
1278	1.97385e+06	PRJNA1107381	SAMN41181183	2022-03-31	Mozambique	Cabo Delgado	dried blood spot
1279	1.97372e+06	PRJNA1107381	SAMN41181176	2022-04-11	Mozambique	Cabo Delgado	dried blood spot
1280	1.97374e+06	PRJNA1107381	SAMN41181177	2022-03-31	Mozambique	Cabo Delgado	dried blood spot
1281	1.97384e+06	PRJNA1107381	SAMN41181178	2022-04-04	Mozambique	Cabo Delgado	dried blood spot
1282	1973842	PRJNA1107381	SAMN41181180	2022-03-29	Mozambique	Cabo Delgado	dried blood spot
1283	1.97384e+06	PRJNA1107381	SAMN41181179	2022-03-18	Mozambique	Cabo Delgado	dried blood spot
1284	1.97384e+06	PRJNA1107381	SAMN41181181	2022-03-29	Mozambique	Cabo Delgado	dried blood spot
1285	1.97385e+06	PRJNA1107381	SAMN41181182	2022-03-29	Mozambique	Cabo Delgado	dried blood spot
1286	1.96834e+06	PRJNA1107381	SAMN41181151	2022-05-03	Mozambique	Cabo Delgado	dried blood spot
1287	1967762	PRJNA1107381	SAMN41181147	2022-05-31	Mozambique	Cabo Delgado	dried blood spot
1288	1.96841e+06	PRJNA1107381	SAMN41181154	2022-05-31	Mozambique	Cabo Delgado	dried blood spot
1289	1.96769e+06	PRJNA1107381	SAMN41181144	2022-05-31	Mozambique	Cabo Delgado	dried blood spot
1290	1.97011e+06	PRJNA1107381	SAMN41181863	2022-04-17	Mozambique	Tete	dried blood spot
1291	1.96837e+06	PRJNA1107381	SAMN41181153	2022-03-21	Mozambique	Cabo Delgado	dried blood spot
1292	1.96832e+06	PRJNA1107381	SAMN41181150	2022-03-21	Mozambique	Cabo Delgado	dried blood spot
1293	1968314	PRJNA1107381	SAMN41181149	2022-04-28	Mozambique	Cabo Delgado	dried blood spot
1294	1.96841e+06	PRJNA1107381	SAMN41181155	2022-05-31	Mozambique	Cabo Delgado	dried blood spot
1295	1.96769e+06	PRJNA1107381	SAMN41181143	2022-05-27	Mozambique	Cabo Delgado	dried blood spot
1296	1.96771e+06	PRJNA1107381	SAMN41181146	2022-06-02	Mozambique	Cabo Delgado	dried blood spot
1297	1.96779e+06	PRJNA1107381	SAMN41181148	2022-05-27	Mozambique	Cabo Delgado	dried blood spot
1298	1.96835e+06	PRJNA1107381	SAMN41181152	2022-05-09	Mozambique	Cabo Delgado	dried blood spot
1299	1.9677e+06	PRJNA1107381	SAMN41181145	2022-05-31	Mozambique	Cabo Delgado	dried blood spot
1300	1.96841e+06	PRJNA1107381	SAMN41181156	2022-05-27	Mozambique	Cabo Delgado	dried blood spot
1301	1.96996e+06	PRJNA1107381	SAMN41181858	2022-08-04	Mozambique	Tete	dried blood spot
1302	1.96995e+06	PRJNA1107381	SAMN41181857	2022-08-03	Mozambique	Tete	dried blood spot
1303	1.96998e+06	PRJNA1107381	SAMN41181859	2022-08-12	Mozambique	Tete	dried blood spot
1304	1.9701e+06	PRJNA1107381	SAMN41181862	2022-04-19	Mozambique	Tete	dried blood spot
1305	1.97026e+06	PRJNA1107381	SAMN41181864	2022-05-31	Mozambique	Tete	dried blood spot
1306	1.97088e+06	PRJNA1107381	SAMN41181869	2022-08-17	Mozambique	Tete	dried blood spot
1307	1.97095e+06	PRJNA1107381	SAMN41181871	2022-08-20	Mozambique	Tete	dried blood spot
1308	1970926	PRJNA1107381	SAMN41181870	2022-06-03	Mozambique	Tete	dried blood spot
1309	1.97316e+06	PRJNA1107381	SAMN41181161	2022-05-23	Mozambique	Cabo Delgado	dried blood spot
1310	1.97047e+06	PRJNA1107381	SAMN41181865	2022-04-04	Mozambique	Tete	dried blood spot
1311	1.9701e+06	PRJNA1107381	SAMN41181861	2022-04-17	Mozambique	Tete	dried blood spot
1312	1.97048e+06	PRJNA1107381	SAMN41181866	2022-04-04	Mozambique	Tete	dried blood spot
1313	1.97106e+06	PRJNA1107381	SAMN41181873	2022-04-13	Mozambique	Tete	dried blood spot
1314	1.971e+06	PRJNA1107381	SAMN41181872	2022-07-27	Mozambique	Tete	dried blood spot
1315	1.97106e+06	PRJNA1107381	SAMN41181874	2022-04-13	Mozambique	Tete	dried blood spot
1316	1.96996e+06	PRJNA1107381	SAMN41181883	2022-08-04	Mozambique	Tete	dried blood spot
1317	1.96994e+06	PRJNA1107381	SAMN41181882	2022-07-17	Mozambique	Tete	dried blood spot
1318	1.97001e+06	PRJNA1107381	SAMN41181885	2022-08-25	Mozambique	Tete	dried blood spot
1319	1.96994e+06	PRJNA1107381	SAMN41181881	2022-08-12	Mozambique	Tete	dried blood spot
1320	1.97052e+06	PRJNA1107381	SAMN41181910	2022-04-12	Mozambique	Tete	dried blood spot
1321	1.97011e+06	PRJNA1107381	SAMN41181891	2022-04-18	Mozambique	Tete	dried blood spot
1322	1.97011e+06	PRJNA1107381	SAMN41181890	2022-04-17	Mozambique	Tete	dried blood spot
1323	1.97008e+06	PRJNA1107381	SAMN41181887	2022-08-20	Mozambique	Tete	dried blood spot
1324	1.97006e+06	PRJNA1107381	SAMN41181886	2022-08-25	Mozambique	Tete	dried blood spot
1325	1.97009e+06	PRJNA1107381	SAMN41181889	2022-04-18	Mozambique	Tete	dried blood spot
1326	1.97012e+06	PRJNA1107381	SAMN41181892	2022-04-14	Mozambique	Tete	dried blood spot
1327	1.97088e+06	PRJNA1107381	SAMN41181922	2022-08-17	Mozambique	Tete	dried blood spot
1328	1.97013e+06	PRJNA1107381	SAMN41181894	2022-08-19	Mozambique	Tete	dried blood spot
1329	1.97013e+06	PRJNA1107381	SAMN41181893	2022-04-10	Mozambique	Tete	dried blood spot
1330	1.9702e+06	PRJNA1107381	SAMN41181895	2022-08-29	Mozambique	Tete	dried blood spot
1331	1.97037e+06	PRJNA1107381	SAMN41181901	2022-07-19	Mozambique	Tete	dried blood spot
1332	1.97024e+06	PRJNA1107381	SAMN41181896	2022-09-26	Mozambique	Tete	dried blood spot
1333	1.97033e+06	PRJNA1107381	SAMN41181899	2022-08-02	Mozambique	Tete	dried blood spot
1334	1.97036e+06	PRJNA1107381	SAMN41181900	2022-08-20	Mozambique	Tete	dried blood spot
1335	1.97037e+06	PRJNA1107381	SAMN41181903	2022-08-24	Mozambique	Tete	dried blood spot
1336	1.97037e+06	PRJNA1107381	SAMN41181902	2022-09-01	Mozambique	Tete	dried blood spot
1337	1.97049e+06	PRJNA1107381	SAMN41181908	2022-04-28	Mozambique	Tete	dried blood spot
1338	1.97052e+06	PRJNA1107381	SAMN41181911	2022-09-24	Mozambique	Tete	dried blood spot
1339	1.97059e+06	PRJNA1107381	SAMN41181914	2022-04-14	Mozambique	Tete	dried blood spot
1340	1.97059e+06	PRJNA1107381	SAMN41181913	2022-04-12	Mozambique	Tete	dried blood spot
1341	1.97071e+06	PRJNA1107381	SAMN41181916	2022-09-19	Mozambique	Tete	dried blood spot
1342	1.97054e+06	PRJNA1107381	SAMN41181912	2022-07-15	Mozambique	Tete	dried blood spot
1343	1.97109e+06	PRJNA1107381	SAMN41181940	2022-07-05	Mozambique	Tete	dried blood spot
1344	1.97138e+06	PRJNA1107381	SAMN41181943	2022-07-04	Mozambique	Tete	dried blood spot
1345	1.97088e+06	PRJNA1107381	SAMN41181920	2022-08-20	Mozambique	Tete	dried blood spot
1346	1.9706e+06	PRJNA1107381	SAMN41181915	2022-04-12	Mozambique	Tete	dried blood spot
1347	1.97072e+06	PRJNA1107381	SAMN41181917	2022-09-20	Mozambique	Tete	dried blood spot
1348	1.97088e+06	PRJNA1107381	SAMN41181921	2022-08-19	Mozambique	Tete	dried blood spot
1349	1.97146e+06	PRJNA1107381	SAMN41181948	2022-04-04	Mozambique	Tete	dried blood spot
1350	1.97095e+06	PRJNA1107381	SAMN41181926	2022-06-06	Mozambique	Tete	dried blood spot
1351	1.97089e+06	PRJNA1107381	SAMN41181923	2022-07-13	Mozambique	Tete	dried blood spot
1352	1.94879e+06	PRJNA1107381	SAMN41181880	2022-09-21	Mozambique	Tete	dried blood spot
1353	1.97096e+06	PRJNA1107381	SAMN41181927	2022-08-20	Mozambique	Tete	dried blood spot
1354	1.97094e+06	PRJNA1107381	SAMN41181925	2022-04-28	Mozambique	Tete	dried blood spot
1355	1.97091e+06	PRJNA1107381	SAMN41181924	2022-07-25	Mozambique	Tete	dried blood spot
1356	1.97104e+06	PRJNA1107381	SAMN41181933	2022-03-29	Mozambique	Tete	dried blood spot
1357	1.97105e+06	PRJNA1107381	SAMN41181934	2022-03-31	Mozambique	Tete	dried blood spot
1358	1.97098e+06	PRJNA1107381	SAMN41181929	2022-04-21	Mozambique	Tete	dried blood spot
1359	1.97099e+06	PRJNA1107381	SAMN41181930	2022-04-24	Mozambique	Tete	dried blood spot
1360	1.97102e+06	PRJNA1107381	SAMN41181932	2022-04-21	Mozambique	Tete	dried blood spot
1361	1.97098e+06	PRJNA1107381	SAMN41181928	2022-04-22	Mozambique	Tete	dried blood spot
1362	1.97105e+06	PRJNA1107381	SAMN41181935	2022-03-31	Mozambique	Tete	dried blood spot
1363	1.97107e+06	PRJNA1107381	SAMN41181937	2022-05-30	Mozambique	Tete	dried blood spot
1364	1.97106e+06	PRJNA1107381	SAMN41181936	2022-07-11	Mozambique	Tete	dried blood spot
1365	1.97134e+06	PRJNA1107381	SAMN41181942	2022-07-07	Mozambique	Tete	dried blood spot
1366	1.97109e+06	PRJNA1107381	SAMN41181941	2022-07-04	Mozambique	Tete	dried blood spot
1367	1.97138e+06	PRJNA1107381	SAMN41181944	2022-06-01	Mozambique	Tete	dried blood spot
1368	1.97107e+06	PRJNA1107381	SAMN41181938	2022-07-05	Mozambique	Tete	dried blood spot
1369	1.97141e+06	PRJNA1107381	SAMN41181945	2022-04-24	Mozambique	Tete	dried blood spot
1370	1.97141e+06	PRJNA1107381	SAMN41181946	2022-06-03	Mozambique	Tete	dried blood spot
1371	1.97142e+06	PRJNA1107381	SAMN41181208	2022-06-06	Mozambique	Cabo Delgado	dried blood spot
1372	1.97142e+06	PRJNA1107381	SAMN41181207	2022-06-06	Mozambique	Cabo Delgado	dried blood spot
1373	1.97142e+06	PRJNA1107381	SAMN41181947	2022-03-28	Mozambique	Tete	dried blood spot
1374	1.97147e+06	PRJNA1107381	SAMN41181951	2022-04-10	Mozambique	Tete	dried blood spot
1375	1.97146e+06	PRJNA1107381	SAMN41181949	2022-04-04	Mozambique	Tete	dried blood spot
1376	1.97144e+06	PRJNA1107381	SAMN41181209	2022-05-27	Mozambique	Cabo Delgado	dried blood spot
1377	1.97148e+06	PRJNA1107381	SAMN41181952	2022-04-05	Mozambique	Tete	dried blood spot
1378	1.97314e+06	PRJNA1107381	SAMN41181211	2022-05-23	Mozambique	Cabo Delgado	dried blood spot
1379	1.9733e+06	PRJNA1107381	SAMN41181214	2022-03-22	Mozambique	Cabo Delgado	dried blood spot
1380	1.97332e+06	PRJNA1107381	SAMN41181216	2022-04-01	Mozambique	Cabo Delgado	dried blood spot
1381	1.97365e+06	PRJNA1107381	SAMN41181224	2022-03-18	Mozambique	Cabo Delgado	dried blood spot
1382	1.97365e+06	PRJNA1107381	SAMN41181223	2022-04-01	Mozambique	Cabo Delgado	dried blood spot
1383	1.97368e+06	PRJNA1107381	SAMN41181226	2022-03-28	Mozambique	Cabo Delgado	dried blood spot
1384	1.9737e+06	PRJNA1107381	SAMN41181227	2022-04-14	Mozambique	Cabo Delgado	dried blood spot
1385	1.97377e+06	PRJNA1107381	SAMN41181230	2022-04-06	Mozambique	Cabo Delgado	dried blood spot
1386	1.97324e+06	PRJNA1107381	SAMN41181212	2022-03-29	Mozambique	Cabo Delgado	dried blood spot
1387	1.97313e+06	PRJNA1107381	SAMN41181210	2022-06-03	Mozambique	Cabo Delgado	dried blood spot
1388	1.9733e+06	PRJNA1107381	SAMN41181213	2022-03-28	Mozambique	Cabo Delgado	dried blood spot
1389	1.97332e+06	PRJNA1107381	SAMN41181215	2022-03-23	Mozambique	Cabo Delgado	dried blood spot
1390	1.97332e+06	PRJNA1107381	SAMN41181217	2022-04-14	Mozambique	Cabo Delgado	dried blood spot
1391	1.97333e+06	PRJNA1107381	SAMN41181218	2022-03-24	Mozambique	Cabo Delgado	dried blood spot
1392	1.97364e+06	PRJNA1107381	SAMN41181220	2022-04-05	Mozambique	Cabo Delgado	dried blood spot
1393	1.97364e+06	PRJNA1107381	SAMN41181221	2022-04-05	Mozambique	Cabo Delgado	dried blood spot
1394	1.97362e+06	PRJNA1107381	SAMN41181219	2022-03-30	Mozambique	Cabo Delgado	dried blood spot
1395	1.97371e+06	PRJNA1107381	SAMN41181228	2022-04-19	Mozambique	Cabo Delgado	dried blood spot
1396	1.97366e+06	PRJNA1107381	SAMN41181225	2022-03-18	Mozambique	Cabo Delgado	dried blood spot
1397	1.97365e+06	PRJNA1107381	SAMN41181222	2022-03-18	Mozambique	Cabo Delgado	dried blood spot
1398	1.97382e+06	PRJNA1107381	SAMN41181231	2022-04-04	Mozambique	Cabo Delgado	dried blood spot
1399	1.97384e+06	PRJNA1107381	SAMN41181232	2022-03-29	Mozambique	Cabo Delgado	dried blood spot
1400	1.96767e+06	PRJNA1107381	SAMN41181185	2022-06-08	Mozambique	Cabo Delgado	dried blood spot
1401	1.96767e+06	PRJNA1107381	SAMN41181186	2022-05-25	Mozambique	Cabo Delgado	dried blood spot
1402	1.96767e+06	PRJNA1107381	SAMN41181187	2022-05-26	Mozambique	Cabo Delgado	dried blood spot
1403	1.9677e+06	PRJNA1107381	SAMN41181190	2022-06-02	Mozambique	Cabo Delgado	dried blood spot
1404	1.96769e+06	PRJNA1107381	SAMN41181188	2022-06-06	Mozambique	Cabo Delgado	dried blood spot
1405	1.96769e+06	PRJNA1107381	SAMN41181189	2022-06-06	Mozambique	Cabo Delgado	dried blood spot
1406	1.96771e+06	PRJNA1107381	SAMN41181193	2022-06-02	Mozambique	Cabo Delgado	dried blood spot
1407	1.96771e+06	PRJNA1107381	SAMN41181192	2022-06-02	Mozambique	Cabo Delgado	dried blood spot
1408	1.9677e+06	PRJNA1107381	SAMN41181191	2022-06-02	Mozambique	Cabo Delgado	dried blood spot
1409	1.96771e+06	PRJNA1107381	SAMN41181194	2022-06-02	Mozambique	Cabo Delgado	dried blood spot
1410	1.96772e+06	PRJNA1107381	SAMN41181195	2022-06-02	Mozambique	Cabo Delgado	dried blood spot
1411	1.96773e+06	PRJNA1107381	SAMN41181199	2022-06-02	Mozambique	Cabo Delgado	dried blood spot
1412	1.96772e+06	PRJNA1107381	SAMN41181196	2022-06-02	Mozambique	Cabo Delgado	dried blood spot
1413	1.96772e+06	PRJNA1107381	SAMN41181198	2022-06-02	Mozambique	Cabo Delgado	dried blood spot
1414	1.96773e+06	PRJNA1107381	SAMN41181200	2022-06-02	Mozambique	Cabo Delgado	dried blood spot
1415	1.96777e+06	PRJNA1107381	SAMN41181201	2022-06-01	Mozambique	Cabo Delgado	dried blood spot
1416	1.97024e+06	PRJNA1107381	SAMN41181897	2022-08-15	Mozambique	Tete	dried blood spot
1417	1.9684e+06	PRJNA1107381	SAMN41181205	2022-05-31	Mozambique	Cabo Delgado	dried blood spot
1418	1.9683e+06	PRJNA1107381	SAMN41181203	2022-04-04	Mozambique	Cabo Delgado	dried blood spot
1419	1.97047e+06	PRJNA1107381	SAMN41181907	2022-04-04	Mozambique	Tete	dried blood spot
1420	1.97051e+06	PRJNA1107381	SAMN41181909	2022-04-27	Mozambique	Tete	dried blood spot
1421	1.9684e+06	PRJNA1107381	SAMN41181206	2022-05-31	Mozambique	Cabo Delgado	dried blood spot
1422	1.96998e+06	PRJNA1107381	SAMN41181884	2022-07-19	Mozambique	Tete	dried blood spot
1423	1.81733e+06	PRJNA1107381	SAMN41180173	2022	Mozambique	Nampula	dried blood spot
1424	1.81733e+06	PRJNA1107381	SAMN41180175	2022	Mozambique	Nampula	dried blood spot
1425	1922886	PRJNA1107381	SAMN41180177	2022	Mozambique	Nampula	dried blood spot
1426	1.92294e+06	PRJNA1107381	SAMN41180178	2022	Mozambique	Nampula	dried blood spot
1427	1.92302e+06	PRJNA1107381	SAMN41180179	2022	Mozambique	Nampula	dried blood spot
1428	1.92305e+06	PRJNA1107381	SAMN41180183	2022	Mozambique	Nampula	dried blood spot
1429	1.92306e+06	PRJNA1107381	SAMN41180184	2022	Mozambique	Nampula	dried blood spot
1430	1.92307e+06	PRJNA1107381	SAMN41180186	2022	Mozambique	Nampula	dried blood spot
1431	1.92314e+06	PRJNA1107381	SAMN41180188	2022	Mozambique	Nampula	dried blood spot
1432	1.92317e+06	PRJNA1107381	SAMN41180189	2022	Mozambique	Nampula	dried blood spot
1433	1.92317e+06	PRJNA1107381	SAMN41180190	2022	Mozambique	Nampula	dried blood spot
1434	1.92319e+06	PRJNA1107381	SAMN41180191	2022	Mozambique	Nampula	dried blood spot
1435	1.92319e+06	PRJNA1107381	SAMN41180192	2022	Mozambique	Nampula	dried blood spot
1436	1.92319e+06	PRJNA1107381	SAMN41180193	2022	Mozambique	Nampula	dried blood spot
1437	1923199	PRJNA1107381	SAMN41180194	2022	Mozambique	Nampula	dried blood spot
1438	1.9232e+06	PRJNA1107381	SAMN41180195	2022	Mozambique	Nampula	dried blood spot
1439	1.94872e+06	PRJNA1107381	SAMN41180206	2022	Mozambique	Nampula	dried blood spot
1440	1.94872e+06	PRJNA1107381	SAMN41180207	2022	Mozambique	Nampula	dried blood spot
1441	1.94876e+06	PRJNA1107381	SAMN41180208	2022	Mozambique	Nampula	dried blood spot
1442	1.94882e+06	PRJNA1107381	SAMN41180209	2022	Mozambique	Nampula	dried blood spot
1443	1.92302e+06	PRJNA1107381	SAMN41180219	2022	Mozambique	Nampula	dried blood spot
1444	1.92304e+06	PRJNA1107381	SAMN41180220	2022	Mozambique	Nampula	dried blood spot
1445	1.92316e+06	PRJNA1107381	SAMN41180221	2022	Mozambique	Nampula	dried blood spot
1446	1.92319e+06	PRJNA1107381	SAMN41180222	2022	Mozambique	Nampula	dried blood spot
1447	1948725	PRJNA1107381	SAMN41180224	2022	Mozambique	Nampula	dried blood spot
1448	1.81708e+06	PRJNA1107381	SAMN41180228	2022	Mozambique	Nampula	dried blood spot
1449	1.81712e+06	PRJNA1107381	SAMN41180230	2022	Mozambique	Nampula	dried blood spot
1450	1.81802e+06	PRJNA1107381	SAMN41180236	2022	Mozambique	Nampula	dried blood spot
1451	1.92291e+06	PRJNA1107381	SAMN41180238	2022	Mozambique	Nampula	dried blood spot
1452	1.92293e+06	PRJNA1107381	SAMN41180241	2022	Mozambique	Nampula	dried blood spot
1453	1.92295e+06	PRJNA1107381	SAMN41180242	2022	Mozambique	Nampula	dried blood spot
1454	1.92301e+06	PRJNA1107381	SAMN41180243	2022	Mozambique	Nampula	dried blood spot
1455	1.92301e+06	PRJNA1107381	SAMN41180244	2022	Mozambique	Nampula	dried blood spot
1456	1.92305e+06	PRJNA1107381	SAMN41180245	2022	Mozambique	Nampula	dried blood spot
1457	1.92309e+06	PRJNA1107381	SAMN41180250	2022	Mozambique	Nampula	dried blood spot
1458	1923087	PRJNA1107381	SAMN41180251	2022	Mozambique	Nampula	dried blood spot
1459	1923173	PRJNA1107381	SAMN41180253	2022	Mozambique	Nampula	dried blood spot
1460	1.92324e+06	PRJNA1107381	SAMN41180256	2022	Mozambique	Nampula	dried blood spot
1461	1.92328e+06	PRJNA1107381	SAMN41180259	2022	Mozambique	Nampula	dried blood spot
1462	1923285	PRJNA1107381	SAMN41180260	2022	Mozambique	Nampula	dried blood spot
1463	1.94852e+06	PRJNA1107381	SAMN41180261	2022	Mozambique	Nampula	dried blood spot
1464	1.94872e+06	PRJNA1107381	SAMN41180263	2022	Mozambique	Nampula	dried blood spot
1465	1.94889e+06	PRJNA1107381	SAMN41180264	2022	Mozambique	Nampula	dried blood spot
1466	1948910	PRJNA1107381	SAMN41180265	2022	Mozambique	Nampula	dried blood spot
